# Supplementary material for: Combining Standard Molecular Typing and Whole Genome Sequencing to Investigate Pseudomonas aeruginosa Epidemiology in Intensive Care Units
Source: Front Public Health. 2020 Jan 28;8:3. doi: 10.3389/fpubh.2020.00003 (PMC6997133; doi:10.3389/fpubh.2020.00003)
Supplement: Table S2 — Summary of the detected resistance and virulence genes in the 153 P. aeruginosa isolates. [file Table_2.XLSX]

## Sheet: SRST2_ARGannot
Isolate #	Patient #	Patient_Isolate	Sample_date	DLST	MLST	Outbreak	Aph3-IIb_Agly(1503)	CatB7_Phe (1178)	OXA-50_Bla (1499)	AacAad_Agly (AadA6_1682)	AacAad_Agly (AadA7_1683)	SulI_Sul (1616)	StrA_Agly (1501)	StrB_Agly (1614)
H25179	Env. 6	Env. 6_H25179	2012-03-23	1-18	1076	Burn unit	yes	yes	yes	no	no	no	no	no
H25525	Patient 21	Patient 21_H25525	2012-03-04	1-18	1076	Burn unit	yes	yes	yes	no	no	no	no	no
H25792	Patient 18	Patient 18_H25792	2011-12-11	1-18	1076	Burn unit	yes	yes	yes	no	no	no	no	no
H26063	Patient 5	Patient 5_H26063	2011-01-24	1-18	1076	Burn unit	yes	yes	yes	no	no	no	no	no
H26166	Patient 22	Patient 22_H26166	2012-04-22	1-18	1076	Burn unit	yes	yes	yes	no	no	no	no	no
H25644	Patient 21	Patient 21_H25644	2012-03-22	1-18	1076	Burn unit	yes	yes	yes	no	no	no	no	no
H26929	Env. 14	Env. 14_H26929	2013-01-25	1-18	1076	Burn unit	yes	yes	yes	no	no	no	no	no
H25529	Patient 20	Patient 20_H25529	2012-03-13	1-18	1076	Burn unit	yes	yes	yes	no	no	no	no	no
H25706	Patient 8	Patient 8_H25706	2011-03-13	1-18	1076	Burn unit	yes	yes	yes	no	no	no	no	no
H25721	Patient 10	Patient 10_H25721	2011-05-02	1-18	1076	Burn unit	yes	yes	yes	no	no	no	no	no
H25509	Patient 17	Patient 17_H25509	2012-12-08	1-18	1076	Burn unit	yes	yes	yes	no	no	no	no	no
H25688	Patient 9	Patient 9_H25688	2011-05-18	1-18	1076	Burn unit	yes	yes	yes	no	no	no	no	no
H25524	Patient 20	Patient 20_H25524	2012-02-27	1-18	1076	Burn unit	yes	yes	yes	no	no	no	no	no
H26928	Env. 13	Env. 13_H26928	2013-01-25	1-18	1076	Burn unit	yes	yes	yes	no	no	no	no	no
H25784	Env. 9	Env. 9_H25784	2012-07-17	1-18	1076	Burn unit	yes	yes	yes	no	no	no	no	no
H26927	Env. 12	Env. 12_H26927	2013-01-25	1-18	1076	Burn unit	yes	yes	yes	no	no	no	no	no
H25954	Patient 14	Patient 14_H25954	2011-10-10	1-18	1076	Burn unit	yes	yes	yes	no	no	no	no	no
H25469	Patient 21	Patient 21_H25469	2012-03-18	1-18	1076	Burn unit	yes	yes	yes	no	no	no	no	no
H25841	Env. 10	Env. 10_H25841	2012-07-27	1-18	1076	Burn unit	yes	yes	yes	no	no	no	no	no
H26073	Patient 4	Patient 4_H26073	2011-03-01	1-18	1076	Burn unit	yes	yes	yes	no	no	no	no	no
H27450	Patient 24	Patient 24_H27450	2012-10-18	1-18	1076	Burn unit	yes	yes	yes	no	no	no	no	no
H26076	Patient 9	Patient 9_H26076	2011-03-21	1-18	1076	Burn unit	yes	yes	yes	no	no	no	no	no
H25731	Patient 13	Patient 13_H25731	2011-07-14	1-18	1076	Burn unit	yes	yes	yes	no	no	no	no	no
H25727	Patient 12	Patient 12_H25727	2011-06-26	1-18	1076	Burn unit	yes	yes	yes	no	no	no	no	no
H26482	Patient 24	Patient 24_H26482	2012-10-18	1-18	1076	Burn unit	yes	yes	yes	no	no	no	no	no
H25982	Patient 9	Patient 9_H25982	2011-07-01	1-18	1076	Burn unit	yes	yes	yes	no	no	no	no	no
H25905	Patient 4	Patient 4_H25905	2011-05-10	1-18	1076	Burn unit	yes	yes	yes	no	no	no	no	no
H25716	Patient 4	Patient 4_H25716	2011-04-03	1-18	1076	Burn unit	yes	yes	yes	no	no	no	no	no
H25776	Patient 7	Patient 7_H25776	2011-02-01	1-18	1076	Burn unit	yes	yes	yes	no	no	no	no	no
H25571	Patient 17	Patient 17_H25571	2012-03-01	1-18	1076	Burn unit	yes	yes	yes	no	no	no	no	no
H25915	Patient 12	Patient 12_H25915	2011-07-25	1-18	1076	Burn unit	yes	yes	yes	no	no	no	no	no
H25638	Patient 17	Patient 17_H25638	2012-01-30	1-18	1076	Burn unit	yes	yes	yes	no	no	no	no	no
H26490	Env. 11	Env. 11_H26490	2012-10-24	1-18	1076	Burn unit	yes	yes	yes	no	no	no	no	no
H25599	Patient 16	Patient 16_H25599	2012-12-04	1-18	1076	Burn unit	yes	yes	yes	no	no	no	no	no
H25165	Env. 5	Env. 5_H25165	2012-03-23	1-18	1076	Burn unit	yes	yes	yes	no	no	no	no	no
H26932	Env. 16	Env. 16_H26932	2013-01-25	1-18	1076	Burn unit	yes	yes	yes	no	no	no	no	no
H26071	Patient 8	Patient 8_H26071	2011-02-28	1-18	1076	Burn unit	yes	yes	yes	no	no	no	no	no
H25328	Patient 21	Patient 21_H25328	2012-04-13	1-18	1076	Burn unit	yes	yes	yes	no	no	no	no	no
H25305	Env. 8	Env. 8_H25305	2012-04-27	1-18	1076	Burn unit	yes	yes	yes	no	no	no	no	no
H25164	Env. 4	Env. 4_H25164	2012-03-23	1-18	1076	Burn unit	yes	yes	yes	no	no	no	no	no
H25163	Env. 3	Env. 3_H25163	2012-03-23	1-18	1076	Burn unit	yes	yes	yes	no	no	no	no	no
H25162	Env. 2	Env. 2_H25162	2012-03-23	1-18	1076	Burn unit	yes	yes	yes	no	no	no	no	no
H25913	Patient 11	Patient 11_H25913	2011-06-11	1-18	1076	Burn unit	yes	yes	yes	no	no	no	no	no
H25570	Patient 18	Patient 18_H25570	2012-02-01	1-18	1076	Burn unit	yes	yes	yes	no	no	no	no	no
H25473	Patient 21	Patient 21_H25473	2012-03-16	1-18	1076	Burn unit	yes	yes	yes	no	no	no	no	no
H26935	Env. 18	Env. 18_H26935	2013-01-25	1-18	1076	Burn unit	yes	yes	yes	no	no	no	no	no
H26934	Env. 17	Env. 17_H26934	2013-01-25	1-18	1076	Burn unit	yes	yes	yes	no	no	no	no	no
H26408	Patient 4	Patient 4_H26408	2011-04-13	1-18	1076	Burn unit	yes	yes	yes	no	no	no	no	no
H26931	Env. 15	Env. 15_H26931	2013-01-25	1-18	1076	Burn unit	yes	yes	yes	no	no	no	no	no
H25791	Patient 17	Patient 17_H25791	2011-12-07	1-18	1076	Burn unit	yes	yes	yes	no	no	no	no	no
H26188	Patient 22	Patient 22_H26188	2012-05-03	1-18	1076	Burn unit	yes	yes	yes	no	no	no	no	no
H25515	Patient 17	Patient 17_H25515	2012-02-01	1-18	1076	Burn unit	yes	yes	yes	no	no	no	no	no
H25184	Env. 7	Env. 7_H25184	2012-03-23	1-18	1076	Burn unit	yes	yes	yes	no	no	no	no	no
H25883	Patient 2	Patient 2_H25883	2010-05-28	1-18	1076	Burn unit	yes	yes	yes	no	no	no	no	no
H26420	Patient 17	Patient 17_H26420	2012-02-15	1-18	1076	Burn unit	yes	yes	yes	no	no	no	no	no
H25689	Patient 11	Patient 11_H25689	2011-06-06	1-18	1076	Single	yes	yes	yes	no	no	no	no	no
H26795	Patient 1	Patient 1_H26795	2010-04-24	1-18	1076	Single	yes	yes	yes	no	no	no	no	no
H25471	Patient 22	Patient 22_H25471	2012-04-25	1-18	1076	Burn unit	yes	yes	yes	no	no	no	no	no
H26413	Patient 15	Patient 15_H26413	2011-10-16	1-18	1076	Burn unit	yes	yes	yes	no	no	no	no	no
H27476	Patient 24	Patient 24_H27476	2012-10-25	1-18	1076	Burn unit	yes	yes	yes	no	no	no	no	no
H26060	Patient 4	Patient 4_H26060	2011-01-13	1-18	1076	Burn unit	yes	yes	yes	no	no	no	no	no
H26069	Patient 8	Patient 8_H26069	2011-02-22	1-18	1076	Burn unit	yes	yes	yes	no	no	no	no	no
H26410	Patient 4	Patient 4_H26410	2011-04-18	1-18	1076	Burn unit	yes	yes	yes	no	no	no	no	no
H25624	Patient 23	Patient 23_H25624	2012-06-25	1-18	1076	Burn unit	yes	yes	yes	no	no	no	no	no
H26078	Patient 9	Patient 9_H26078	2011-04-04	1-18	1076	Burn unit	yes	yes	yes	no	no	no	no	no
H25916	Patient 13	Patient 13_H25916	2011-07-26	1-18	1076	Burn unit	yes	yes	yes	no	no	no	no	no
H25604	Patient 19	Patient 19_H25604	2012-01-03	1-18	1076	Burn unit	yes	yes	yes	no	no	no	no	no
H26064	Patient 6	Patient 6_H26064	2011-01-30	1-18	1076	Burn unit	yes	yes	yes	no	no	no	no	no
H24445	Env. 1	Env. 1_H24445	2011-10-10	1-18	1076	Burn unit	yes	yes	yes	no	no	no	no	no
H26798	Patient 1	Patient 1_H26798	2010-03-31	1-18	1076	Burn unit	yes	yes	yes	no	no	no	no	no
H25637	Patient 18	Patient 18_H25637	2012-02-18	1-18	1076	Burn unit	yes	yes	yes	no	no	no	no	no
H26230	Patient 3	Patient 3_H26230	2010-08-15	1-18	1076	Burn unit	yes	yes	yes	no	no	no	no	no
H26045	Patient 3	Patient 3_H26045	2010-08-28	1-18	1076	Burn unit	yes	yes	yes	no	no	no	no	no
H25692	Patient 9	Patient 9_H25692	2011-06-08	1-18	1076	Burn unit	yes	yes	yes	no	no	no	no	no
H25532	Patient 10	Patient 10_H25532	2012-03-31	1-21	253	ICU2	yes	yes	yes	yes	no	yes	no	no
H25882	Patient 2	Patient 2_H25882	2010-05-03	1-21	253	Single	yes	yes	yes	no	no	no	no	no
H26926	Env. 11	Env. 11_H26926	2013-01-25	1-21	253	Single	yes	yes	yes	no	no	no	no	no
H25581	Patient 6	Patient 6_H25581	2011-02-28	1-21	253	Single	yes	yes	yes	no	yes	yes	no	no
H30280	Patient 16	Patient 16_H30280	2014-09-01	1-21	253	Single	yes	yes	yes	yes	no	yes	no	no
H25209	Env. 5	Env. 5_H25209	2012-04-02	1-21	253	ICU2	yes	yes	yes	yes	no	yes	no	no
H26049	Patient 5	Patient 5_H26049	2010-10-27	1-21	253	Single	yes	yes	yes	no	no	no	no	no
H26591	Env. 7	Env. 7_H26591	2012-11-13	1-21	253	Single	yes	yes	yes	no	no	no	no	no
H26662	Patient 13	Patient 13_H26662	2012-12-04	1-21	253	Single	yes	no	yes	no	no	no	no	no
H25710	Patient 7	Patient 7_H25710	2011-04-03	1-21	253	Single	yes	yes	yes	no	no	no	no	no
H28128	Env. 13	Env. 13_H28128	2013-05-29	1-21	253	Single	yes	yes	yes	no	no	no	no	no
H25634	Patient 11	Patient 11_H25634	2012-04-10	1-21	253	ICU2	yes	yes	yes	yes	no	yes	no	no
H26031	Patient 2	Patient 2_H26031	2010-04-29	1-21	253	Single	yes	yes	yes	no	no	no	no	no
H26782	Patient 8	Patient 8_H26782	2011-12-08	1-21	253	Single	yes	yes	yes	no	no	no	no	no
H13893	Env. 1	Env. 1_H13893	2004-05-18	1-21	253	Single	yes	yes	yes	yes	no	yes	no	no
H25308	Env. 6	Env. 6_H25308	2012-04-27	1-21	253	Single	yes	yes	yes	no	no	no	no	no
H25167	Env. 3	Env. 3_H25167	2012-03-23	1-21	253	Single	yes	yes	yes	no	no	no	no	no
H30236	Patient 15	Patient 15_H30236	2014-08-08	1-21	253	Single	yes	yes	yes	no	no	no	no	no
H26973	Patient 14	Patient 14_H26973	2013-02-02	1-21	253	Single	yes	yes	yes	no	no	no	no	no
H25175	Env. 4	Env. 4_H25175	2012-03-23	1-21	253	Single	yes	yes	yes	no	no	no	no	no
H14442	Env. 2	Env. 2_H14442	2004-12-23	1-21	253	Single	yes	yes	yes	yes	no	yes	no	no
H27714	Env. 12	Env. 12_H27714	2013-03-07	1-21	253	Single	yes	yes	yes	yes	no	yes	no	no
H25575	Patient 9	Patient 9_H25575	2012-03-13	1-21	253	Single	yes	yes	yes	no	no	no	no	no
H26930	Env. 10	Env. 10_H26930	2013-01-25	1-21	253	Single	yes	yes	yes	no	no	no	no	no
H26933	Env. 9	Env. 9_H26933	2013-01-25	1-21	253	Single	yes	yes	yes	no	no	no	no	no
H26615	Patient 12	Patient 12_H26615	2012-11-07	1-21	253	Single	yes	yes	yes	no	no	no	no	no
H25897	Patient 4	Patient 4_H25897	2010-09-02	1-21	253	Single	yes	yes	yes	no	no	no	no	no
H26677	Env. 8	Env. 8_H26677	2012-12-07	1-21	253	Single	yes	yes	yes	no	no	no	no	no
H26083	Patient 3	Patient 3_H26083	2010-05-18	1-21	253	Single	yes	yes	yes	no	no	no	no	no
H26023	Patient 1	Patient 1_H26023	2010-01-08	1-21	253	Single	yes	yes	yes	no	no	no	no	no
H25601	Patient 6	Patient 6_H25601	2011-12-31	1-21	253	Single	yes	yes	yes	no	yes	yes	no	no
H25200	Env 3	Env. 3_H25200	2012-04-02	6-7	17	Single	yes	yes	yes	no	no	no	no	no
H26571	Env 12	Env. 12_H26571	2012-11-08	6-7	17	Single	yes	yes	yes	no	no	no	no	no
H25284	Env 5	Env. 5_H25284	2012-04-27	6-7	17	Single	yes	yes	yes	no	no	no	no	no
H30438	Patient 21	Patient 21_H30438	2014-10-15	6-7	17	Single	yes	yes	yes	no	no	no	no	no
H25723	Patient 7	Patient 7_H25723	2011-05-04	6-7	17	Single	yes	yes	yes	no	no	no	no	no
H26042	Patient 4	Patient 4_H26042	2010-08-03	6-7	17	Burn unit	yes	yes	yes	no	no	no	no	no
H26722	Env 13	Env. 13_H26722	2012-12-11	6-7	17	Single	yes	yes	yes	no	no	no	no	no
H26532	Env 11	Env. 11_H26532	2012-11-07	6-7	17	Single	yes	yes	yes	no	no	no	no	no
H25787	Env 8	Env. 8_H25787	2012-07-17	6-7	17	Single	yes	yes	yes	no	no	no	no	no
H27995	Patient 15	Patient 15_H27995	2013-04-09	6-7	17	Single	yes	yes	yes	no	no	no	no	no
H25785	Env 7	Env. 7_H25785	2012-07-17	6-7	17	Single	yes	yes	yes	no	no	no	no	no
H26375	Patient 13	Patient 13_H26375	2012-09-26	6-7	17	Single	yes	yes	yes	no	no	no	no	no
H27846	Patient 15	Patient 15_H27846	2013-03-21	6-7	17	Single	yes	yes	yes	no	no	no	no	no
H25889	Patient 3	Patient 3_H25889	2010-07-25	6-7	17	Burn unit	yes	yes	yes	no	no	no	no	no
H25961	Env 9	Env. 9_H25961	2012-07-30	6-7	17	Single	yes	yes	yes	no	no	no	no	no
H28167	Patient 17	Patient 17_H28167	2013-05-30	6-7	17	Single	yes	yes	yes	no	no	no	no	no
H25984	Patient 10	Patient 10_H25984	2011-08-26	6-7	17	Single	yes	yes	yes	no	no	no	no	no
H26760	Patient 14	Patient 14_H26760	2012-12-12	6-7	17	Single	yes	yes	yes	no	no	no	no	no
H25900	Patient 6	Patient 6_H25900	2010-09-16	6-7	17	Single	yes	yes	yes	no	no	no	no	no
H26027	Patient 1	Patient 1_H26027	2010-04-06	6-7	17	Burn unit	yes	yes	yes	no	no	no	no	no
H26036	Patient 2	Patient 2_H26036	2010-06-20	6-7	17	Burn unit	yes	yes	yes	no	no	no	no	no
H25718	Patient 7	Patient 7_H25718	2011-04-19	6-7	17	Single	yes	yes	yes	no	no	no	no	no
H25908	Patient 7	Patient 7_H25908	2011-05-21	6-7	17	Single	yes	yes	yes	no	no	no	no	no
H29762	Env 15	Env. 15_H29762	2014-03-04	6-7	17	Single	yes	yes	yes	no	no	no	no	no
H25298	Env 6	Env. 6_H25298	2012-04-27	6-7	17	Single	yes	yes	yes	no	no	no	no	no
H30429	Patient 20	Patient 20_H30429	2014-10-13	6-7	17	Single	yes	yes	yes	no	no	no	no	no
H24447	Env 2	Env. 2_H24447	2011-10-10	6-7	17	Single	yes	yes	yes	no	no	no	no	no
H26524	Env 10	Env. 10_H26524	2012-11-07	6-7	17	Single	yes	yes	yes	no	no	no	no	no
H26426	Patient 13	Patient 13_H26426	2012-10-07	6-7	17	Single	yes	yes	yes	no	no	no	no	no
H24436	Env 1	Env. 1_H24436	2011-10-10	6-7	845	Single	yes	yes	yes	no	no	no	no	no
H27791	Env 14	Env. 14_H27791	2013-03-20	6-7	17	Single	yes	yes	yes	no	no	no	no	no
H26203	Patient 2	Patient 2_H26203	2010-06-18	6-7	17	Burn unit	yes	yes	yes	no	no	no	no	no
H26202	Patient 2	Patient 2_H26202	2010-06-18	6-7	17	Burn unit	yes	yes	yes	no	no	no	no	no
H29477	Patient 18	Patient 18_H29477	2014-01-10	6-7	17	Single	yes	yes	yes	no	no	no	no	no
H25508	Patient 11	Patient 11_H25508	2011-12-06	6-7	17	Single	yes	yes	yes	no	no	no	no	no
H25979	Patient 5	Patient 5_H25979	2010-09-10	6-7	17	Burn unit	yes	yes	yes	no	no	no	no	no
H26086	Patient 2	Patient 2_H26086	2010-07-10	6-7	17	Burn unit	yes	yes	yes	no	no	no	no	no
H25632	Patient 12	Patient 12_H25632	2012-05-04	6-7	17	Single	yes	yes	yes	no	no	no	yes	yes
H28085	Patient 16	Patient 16_H28085	2013-05-17	6-7	17	Single	yes	yes	yes	no	no	no	no	no
H26247	Patient 11	Patient 11_H26247	2011-11-18	6-7	17	Single	yes	yes	yes	no	no	no	no	no
H26260	Patient 9	Patient 9_H26260	2011-07-30	6-7	17	Single	yes	yes	yes	no	no	no	no	no
H26084	Patient 2	Patient 2_H26084	2010-06-02	6-7	17	Burn unit	yes	yes	yes	no	no	no	no	no
H25952	Patient 8	Patient 8_H25952	2011-07-21	6-7	17	Single	yes	yes	yes	no	no	no	no	no
H26416	Patient 11	Patient 11_H26416	2011-11-07	6-7	17	Single	yes	yes	yes	no	no	no	no	no
H29924	Patient 19	Patient 19_H29924	2014-04-26	6-7	17	Single	yes	yes	yes	no	no	no	no	no
H25213	Env 4	Env. 4_H25213	2012-04-03	6-7	17	Single	yes	yes	yes	no	no	no	no	no
H26044	Patient 5	Patient 5_H26044	2010-08-15	6-7	17	Burn unit	yes	yes	yes	no	no	no	no	no
H26046	Patient 4	Patient 4_H26046	2010-08-30	6-7	17	Burn unit	yes	yes	yes	no	no	no	no	no

## Sheet: ARIBA_CARD
Isolate #	Patient #	Patient_Isolate	Sample_date	DLST	MLST	Outbreak	APH_3___IIb	APH_6__Id	ArmR	AxyY	CrpP	FosA	MexA	MexB	MexC	MexD	MexE	MexF	MexG	MexH	MexI	MexJ	MexK	MexL	MexR	MexS	MexT	MexV	MexW	MexZ	MuxA	MuxB	MuxC	MvaT	OXA_50	OpmB	OpmD	OpmH	OprJ	OprM	OprN	PDC_-	PmpM	Pseudomonas_aeruginosa_CpxR	Pseudomonas_aeruginosa_catB7	Pseudomonas_mutant_PhoP	Pseudomonas_mutant_PhoQ	PvrR	TriA
H25637	Patient 18	Patient 18_H25637	2012-02-18	1-18	1076	Burn unit	yes	no	yes	yes	no	yes	yes	yes	yes	yes	yes	yes	yes	yes	yes	yes	yes	yes	yes	yes	yes	yes	yes	yes	yes	yes	yes	yes	yes	yes	yes	yes	yes	yes	yes	yes	yes	yes	yes	yes	yes	no	yes
H25162	Env. 2	Env. 2_H25162	2012-03-23	1-18	1076	Burn unit	yes	no	yes	yes	no	yes	yes	yes	yes	yes	yes	yes	yes	yes	yes	yes	yes	yes	yes	yes	yes	yes	yes	yes	yes	yes	yes	yes	yes	yes	yes	yes	yes	yes	yes	yes	yes	yes	yes	yes	yes	no	yes
H25163	Env. 3	Env. 3_H25163	2012-03-23	1-18	1076	Burn unit	yes	no	yes	yes	no	yes	yes	yes	yes	yes	yes	yes	yes	yes	yes	yes	yes	yes	yes	yes	yes	yes	yes	yes	yes	yes	yes	yes	yes	yes	yes	yes	yes	yes	yes	yes	yes	yes	yes	yes	yes	no	yes
H25164	Env. 4	Env. 4_H25164	2012-03-23	1-18	1076	Burn unit	yes	no	yes	yes	no	yes	yes	yes	yes	yes	yes	yes	yes	yes	yes	yes	yes	yes	yes	yes	yes	yes	yes	yes	yes	yes	yes	yes	yes	yes	yes	yes	yes	yes	yes	yes	yes	yes	yes	yes	yes	no	yes
H24445	Env. 1	Env. 1_H24445	2011-10-10	1-18	1076	Burn unit	yes	no	yes	yes	no	yes	yes	yes	yes	yes	yes	yes	yes	yes	yes	yes	yes	yes	yes	yes	yes	yes	yes	yes	yes	yes	yes	yes	yes	yes	yes	yes	yes	yes	yes	yes	yes	yes	yes	yes	yes	no	yes
H25165	Env. 5	Env. 5_H25165	2012-03-23	1-18	1076	Burn unit	yes	no	yes	yes	no	yes	yes	yes	yes	yes	yes	yes	yes	yes	yes	yes	yes	yes	yes	yes	yes	yes	yes	yes	yes	yes	yes	yes	yes	yes	yes	yes	yes	yes	yes	yes	yes	yes	yes	yes	yes	no	yes
H25179	Env. 6	Env. 6_H25179	2012-03-23	1-18	1076	Burn unit	yes	no	yes	yes	no	yes	yes	yes	yes	yes	yes	yes	yes	yes	yes	yes	yes	yes	yes	yes	yes	yes	yes	yes	yes	yes	yes	yes	yes	yes	yes	yes	yes	yes	yes	yes	yes	yes	yes	yes	yes	no	yes
H25184	Env. 7	Env. 7_H25184	2012-03-23	1-18	1076	Burn unit	yes	no	yes	yes	no	yes	yes	yes	yes	yes	yes	yes	yes	yes	yes	yes	yes	yes	yes	yes	yes	yes	yes	yes	yes	yes	yes	yes	yes	yes	yes	yes	yes	yes	yes	yes	yes	yes	yes	yes	yes	no	yes
H25305	Env. 8	Env. 8_H25305	2012-04-27	1-18	1076	Burn unit	yes	no	yes	yes	no	yes	yes	yes	yes	yes	yes	yes	yes	yes	yes	yes	yes	yes	yes	yes	yes	yes	yes	yes	yes	yes	yes	yes	yes	yes	yes	yes	yes	yes	yes	yes	yes	yes	yes	yes	yes	no	yes
H25328	Patient 21	Patient 21_H25328	2012-04-13	1-18	1076	Burn unit	yes	no	yes	yes	no	yes	yes	yes	yes	yes	yes	yes	yes	yes	yes	yes	yes	yes	yes	yes	yes	yes	yes	yes	yes	yes	yes	yes	yes	yes	yes	yes	yes	yes	yes	yes	yes	yes	yes	yes	yes	no	yes
H25469	Patient 21	Patient 21_H25469	2012-03-18	1-18	1076	Burn unit	yes	no	yes	yes	no	yes	yes	yes	yes	yes	yes	yes	yes	yes	yes	yes	yes	yes	yes	yes	yes	yes	yes	yes	yes	yes	yes	yes	yes	yes	yes	yes	yes	yes	yes	yes	yes	yes	yes	yes	yes	no	yes
H25471	Patient 22	Patient 22_H25471	2012-04-25	1-18	1076	Burn unit	yes	no	yes	no	no	yes	yes	yes	yes	yes	yes	yes	yes	yes	yes	yes	yes	yes	yes	yes	yes	yes	yes	yes	yes	yes	yes	yes	yes	yes	yes	yes	yes	yes	yes	yes	yes	yes	yes	yes	yes	no	yes
H25473	Patient 21	Patient 21_H25473	2012-03-16	1-18	1076	Burn unit	yes	no	yes	yes	no	yes	yes	yes	yes	yes	yes	yes	yes	yes	yes	yes	yes	yes	yes	yes	yes	yes	yes	yes	yes	yes	yes	yes	yes	yes	yes	yes	yes	yes	yes	yes	yes	yes	yes	yes	yes	no	yes
H25509	Patient 17	Patient 17_H25509	2012-12-08	1-18	1076	Burn unit	yes	no	yes	yes	no	yes	yes	yes	yes	yes	yes	yes	yes	yes	yes	yes	yes	yes	yes	yes	yes	yes	yes	yes	yes	yes	yes	yes	yes	yes	yes	yes	yes	yes	yes	yes	yes	yes	yes	yes	yes	no	yes
H25515	Patient 17	Patient 17_H25515	2012-02-01	1-18	1076	Burn unit	yes	no	yes	yes	no	yes	yes	yes	yes	yes	yes	yes	yes	yes	yes	yes	yes	yes	yes	yes	yes	yes	yes	yes	yes	yes	yes	yes	yes	yes	yes	yes	yes	yes	yes	yes	yes	yes	yes	yes	yes	no	yes
H25524	Patient 20	Patient 20_H25524	2012-02-27	1-18	1076	Burn unit	yes	no	yes	yes	no	yes	yes	yes	yes	yes	yes	yes	yes	yes	yes	yes	yes	yes	yes	yes	yes	yes	yes	yes	yes	yes	yes	yes	yes	yes	yes	yes	yes	yes	yes	yes	yes	yes	yes	yes	yes	no	yes
H25525	Patient 21	Patient 21_H25525	2012-03-04	1-18	1076	Burn unit	yes	no	yes	no	no	yes	yes	yes	yes	yes	yes	yes	yes	yes	yes	yes	yes	yes	yes	yes	yes	yes	yes	yes	yes	yes	yes	yes	yes	yes	yes	yes	yes	yes	yes	yes	yes	yes	yes	yes	yes	no	yes
H25529	Patient 20	Patient 20_H25529	2012-03-13	1-18	1076	Burn unit	yes	no	yes	yes	no	yes	yes	yes	yes	yes	yes	yes	yes	yes	yes	yes	yes	yes	yes	yes	yes	yes	yes	yes	yes	yes	yes	yes	yes	yes	yes	yes	yes	yes	yes	yes	yes	yes	yes	yes	yes	no	yes
H25570	Patient 18	Patient 18_H25570	2012-02-01	1-18	1076	Burn unit	yes	no	yes	yes	no	yes	yes	yes	yes	yes	yes	yes	yes	yes	yes	yes	yes	yes	yes	yes	yes	yes	yes	yes	yes	yes	yes	yes	yes	yes	yes	yes	yes	yes	yes	yes	yes	yes	yes	yes	yes	no	yes
H25571	Patient 17	Patient 17_H25571	2012-03-01	1-18	1076	Burn unit	yes	no	yes	yes	no	yes	yes	yes	yes	yes	yes	yes	yes	yes	yes	yes	yes	yes	yes	yes	yes	yes	yes	yes	yes	yes	yes	yes	yes	yes	yes	yes	yes	yes	yes	yes	yes	yes	yes	yes	yes	no	yes
H25599	Patient 16	Patient 16_H25599	2012-12-04	1-18	1076	Burn unit	yes	no	yes	yes	no	yes	yes	yes	yes	yes	yes	yes	yes	yes	yes	yes	yes	yes	yes	yes	yes	yes	yes	yes	yes	yes	yes	yes	yes	yes	yes	yes	yes	yes	yes	yes	yes	yes	yes	yes	yes	no	yes
H25604	Patient 19	Patient 19_H25604	2012-01-03	1-18	1076	Burn unit	yes	no	yes	yes	no	yes	yes	yes	yes	yes	yes	yes	yes	yes	yes	yes	yes	yes	yes	yes	yes	yes	yes	yes	yes	yes	yes	yes	yes	yes	yes	yes	yes	yes	yes	yes	yes	yes	yes	yes	yes	no	yes
H25624	Patient 23	Patient 23_H25624	2012-06-25	1-18	1076	Burn unit	yes	no	yes	yes	no	yes	yes	yes	yes	yes	yes	yes	yes	yes	yes	yes	yes	yes	yes	yes	yes	yes	yes	yes	yes	yes	yes	yes	yes	yes	yes	yes	yes	yes	yes	yes	yes	yes	yes	yes	yes	no	yes
H25638	Patient 17	Patient 17_H25638	2012-01-30	1-18	1076	Burn unit	yes	no	yes	yes	no	yes	yes	yes	yes	yes	yes	yes	yes	yes	yes	yes	yes	yes	yes	yes	yes	yes	yes	yes	yes	yes	yes	yes	yes	yes	yes	yes	yes	yes	yes	yes	yes	yes	yes	yes	yes	no	yes
H25644	Patient 21	Patient 21_H25644	2012-03-22	1-18	1076	Burn unit	yes	no	yes	yes	no	yes	yes	yes	yes	yes	yes	yes	yes	yes	yes	yes	yes	yes	yes	yes	yes	yes	yes	yes	yes	yes	yes	yes	yes	yes	yes	yes	yes	yes	yes	yes	yes	yes	yes	yes	yes	no	yes
H25688	Patient 9	Patient 9_H25688	2011-05-18	1-18	1076	Burn unit	yes	no	yes	no	no	yes	yes	yes	yes	yes	yes	yes	yes	yes	yes	yes	yes	yes	yes	yes	yes	yes	yes	yes	yes	yes	yes	yes	yes	yes	yes	yes	yes	yes	yes	yes	yes	yes	yes	yes	yes	no	yes
H25689	Patient 11	Patient 11_H25689	2011-06-06	1-18	1076	Burn unit	yes	no	yes	yes	no	yes	yes	yes	yes	yes	yes	yes	yes	yes	yes	yes	yes	yes	yes	yes	yes	yes	yes	yes	yes	yes	yes	yes	yes	yes	yes	yes	yes	yes	yes	yes	yes	yes	yes	yes	yes	no	yes
H25692	Patient 9	Patient 9_H25692	2011-06-08	1-18	1076	Burn unit	yes	no	yes	yes	no	yes	yes	yes	yes	yes	yes	yes	yes	yes	yes	yes	yes	yes	yes	yes	yes	yes	yes	yes	yes	yes	yes	yes	yes	yes	yes	yes	yes	yes	yes	yes	yes	yes	yes	yes	yes	no	yes
H25706	Patient 8	Patient 8_H25706	2011-03-13	1-18	1076	Burn unit	yes	no	yes	yes	no	yes	yes	yes	yes	yes	yes	yes	yes	yes	yes	yes	yes	yes	yes	yes	yes	yes	yes	yes	yes	yes	yes	yes	yes	yes	yes	yes	yes	yes	yes	yes	yes	yes	yes	yes	yes	no	yes
H25716	Patient 4	Patient 4_H25716	2011-04-03	1-18	1076	Burn unit	yes	no	yes	yes	no	yes	yes	yes	yes	yes	yes	yes	yes	yes	yes	yes	yes	yes	yes	yes	yes	yes	yes	yes	yes	yes	yes	yes	yes	yes	yes	yes	yes	yes	yes	yes	yes	yes	yes	yes	yes	no	yes
H25721	Patient 10	Patient 10_H25721	2011-05-02	1-18	1076	Burn unit	yes	no	yes	yes	no	yes	yes	yes	yes	yes	yes	yes	yes	yes	yes	yes	yes	yes	yes	yes	yes	yes	yes	yes	yes	yes	yes	yes	yes	yes	yes	yes	yes	yes	yes	yes	yes	yes	yes	yes	yes	no	yes
H25727	Patient 12	Patient 12_H25727	2011-06-26	1-18	1076	Burn unit	yes	no	yes	yes	no	yes	yes	yes	yes	yes	yes	yes	yes	yes	yes	yes	yes	yes	yes	yes	yes	yes	yes	yes	yes	yes	yes	yes	yes	yes	yes	yes	yes	yes	yes	yes	yes	yes	yes	yes	yes	no	yes
H25731	Patient 13	Patient 13_H25731	2011-07-14	1-18	1076	Burn unit	yes	no	yes	yes	no	yes	yes	yes	yes	yes	yes	yes	yes	yes	yes	yes	yes	yes	yes	yes	yes	yes	yes	yes	yes	yes	yes	yes	yes	yes	yes	yes	yes	yes	yes	yes	yes	yes	yes	yes	yes	no	yes
H25776	Patient 7	Patient 7_H25776	2011-02-01	1-18	1076	Burn unit	yes	no	yes	yes	no	yes	yes	yes	yes	yes	yes	yes	yes	yes	yes	yes	yes	yes	yes	yes	yes	yes	yes	yes	yes	yes	yes	yes	yes	yes	yes	yes	yes	yes	yes	yes	yes	yes	yes	yes	yes	no	yes
H25784	Env. 9	Env. 9_H25784	2012-07-17	1-18	1076	Burn unit	yes	no	yes	no	no	yes	yes	yes	yes	yes	yes	yes	yes	yes	yes	yes	yes	yes	yes	yes	yes	yes	yes	yes	yes	yes	yes	yes	yes	yes	yes	yes	yes	yes	yes	yes	yes	yes	yes	yes	yes	no	yes
H25791	Patient 17	Patient 17_H25791	2011-12-07	1-18	1076	Burn unit	yes	no	yes	yes	no	yes	yes	yes	yes	yes	yes	yes	yes	yes	yes	yes	yes	yes	yes	yes	yes	yes	yes	yes	yes	yes	yes	yes	yes	yes	yes	yes	yes	yes	yes	yes	yes	yes	yes	yes	yes	no	yes
H25792	Patient 18	Patient 18_H25792	2011-12-11	1-18	1076	Burn unit	yes	no	yes	yes	no	yes	yes	yes	yes	yes	yes	yes	yes	yes	yes	yes	yes	yes	yes	yes	yes	yes	yes	yes	yes	yes	yes	yes	yes	yes	yes	yes	yes	yes	yes	yes	yes	yes	yes	yes	yes	no	yes
H25841	Env. 10	Env. 10_H25841	2012-07-27	1-18	1076	Burn unit	yes	no	yes	yes	no	yes	yes	yes	yes	yes	yes	yes	yes	yes	yes	yes	yes	yes	yes	yes	yes	yes	yes	yes	yes	yes	yes	yes	yes	yes	yes	yes	yes	yes	yes	yes	yes	yes	yes	yes	yes	no	yes
H25883	Patient 2	Patient 2_H25883	2010-05-28	1-18	1076	Burn unit	yes	no	yes	yes	no	yes	yes	yes	yes	yes	yes	yes	yes	yes	yes	yes	yes	yes	yes	yes	yes	yes	yes	yes	yes	yes	yes	yes	yes	yes	yes	yes	yes	yes	yes	yes	yes	yes	yes	yes	yes	no	yes
H25905	Patient 4	Patient 4_H25905	2011-05-10	1-18	1076	Burn unit	yes	no	yes	yes	no	yes	yes	yes	yes	yes	yes	yes	yes	yes	yes	yes	yes	yes	yes	yes	yes	yes	yes	yes	yes	yes	yes	yes	yes	yes	yes	yes	yes	yes	yes	yes	yes	yes	yes	yes	yes	no	yes
H25913	Patient 11	Patient 11_H25913	2011-06-11	1-18	1076	Burn unit	yes	no	yes	yes	no	yes	yes	yes	yes	yes	yes	yes	yes	yes	yes	yes	yes	yes	yes	yes	yes	yes	yes	yes	yes	yes	yes	yes	yes	yes	yes	yes	yes	yes	yes	yes	yes	yes	yes	yes	yes	no	yes
H25915	Patient 12	Patient 12_H25915	2011-07-25	1-18	1076	Burn unit	yes	no	yes	yes	no	yes	yes	yes	yes	yes	yes	yes	yes	yes	yes	yes	yes	yes	yes	yes	yes	yes	yes	yes	yes	yes	yes	yes	yes	yes	yes	yes	yes	yes	yes	yes	yes	yes	yes	yes	yes	no	yes
H25916	Patient 13	Patient 13_H25916	2011-07-26	1-18	1076	Burn unit	yes	no	yes	yes	no	yes	yes	yes	yes	yes	yes	yes	yes	yes	yes	yes	yes	yes	yes	yes	yes	yes	yes	yes	yes	yes	yes	yes	yes	yes	yes	yes	yes	yes	yes	yes	yes	yes	yes	yes	yes	no	yes
H25954	Patient 14	Patient 14_H25954	2011-10-10	1-18	1076	Burn unit	yes	no	yes	no	no	yes	yes	yes	yes	yes	yes	yes	yes	yes	yes	yes	yes	yes	yes	yes	yes	yes	yes	yes	yes	yes	yes	yes	yes	yes	yes	yes	yes	yes	yes	yes	yes	yes	yes	yes	yes	no	yes
H25982	Patient 9	Patient 9_H25982	2011-07-01	1-18	1076	Burn unit	yes	no	yes	yes	no	yes	yes	yes	yes	yes	yes	yes	yes	yes	yes	yes	yes	yes	yes	yes	yes	yes	yes	yes	yes	yes	yes	yes	yes	yes	yes	yes	yes	yes	yes	yes	yes	yes	yes	yes	yes	no	yes
H26045	Patient 3	Patient 3_H26045	2010-08-28	1-18	1076	Burn unit	yes	no	yes	yes	no	yes	yes	yes	yes	yes	yes	yes	yes	yes	yes	yes	yes	yes	yes	yes	yes	yes	yes	yes	yes	yes	yes	yes	yes	yes	yes	yes	yes	yes	yes	yes	yes	yes	yes	yes	yes	no	yes
H26060	Patient 4	Patient 4_H26060	2011-01-13	1-18	1076	Burn unit	yes	no	yes	no	no	yes	yes	yes	yes	yes	yes	yes	yes	yes	yes	yes	yes	yes	yes	yes	yes	yes	yes	yes	yes	yes	yes	yes	yes	yes	yes	yes	yes	yes	yes	yes	yes	yes	yes	yes	yes	no	yes
H26063	Patient 5	Patient 5_H26063	2011-01-24	1-18	1076	Burn unit	yes	no	yes	yes	no	yes	yes	yes	yes	yes	yes	yes	yes	yes	yes	yes	yes	yes	yes	yes	yes	yes	yes	yes	yes	yes	yes	yes	yes	yes	yes	yes	yes	yes	yes	yes	yes	yes	yes	yes	yes	no	yes
H26064	Patient 6	Patient 6_H26064	2011-01-30	1-18	1076	Burn unit	yes	no	yes	yes	no	yes	yes	yes	yes	yes	yes	yes	yes	yes	yes	yes	yes	yes	yes	yes	yes	yes	yes	yes	yes	yes	yes	yes	yes	yes	yes	yes	yes	yes	yes	yes	yes	yes	yes	yes	yes	no	yes
H26069	Patient 8	Patient 8_H26069	2011-02-22	1-18	1076	Burn unit	yes	no	yes	yes	no	yes	yes	yes	yes	yes	yes	yes	yes	yes	yes	yes	yes	yes	yes	yes	yes	yes	yes	yes	yes	yes	yes	yes	yes	yes	yes	yes	yes	yes	yes	yes	yes	yes	yes	yes	yes	no	yes
H26071	Patient 8	Patient 8_H26071	2011-02-28	1-18	1076	Burn unit	yes	no	yes	yes	no	yes	yes	yes	yes	yes	yes	yes	yes	yes	yes	yes	yes	yes	yes	yes	yes	yes	yes	yes	yes	yes	yes	yes	yes	yes	yes	yes	yes	yes	yes	yes	yes	yes	yes	yes	yes	no	yes
H26073	Patient 4	Patient 4_H26073	2011-03-01	1-18	1076	Burn unit	yes	no	yes	yes	no	yes	yes	yes	yes	yes	yes	yes	yes	yes	yes	yes	yes	yes	yes	yes	yes	yes	yes	yes	yes	yes	yes	yes	yes	yes	yes	yes	yes	yes	yes	yes	yes	yes	yes	yes	yes	no	yes
H26076	Patient 9	Patient 9_H26076	2011-03-21	1-18	1076	Burn unit	yes	no	yes	no	no	yes	yes	yes	yes	yes	yes	yes	yes	yes	yes	yes	yes	yes	yes	yes	yes	yes	yes	yes	yes	yes	yes	yes	yes	yes	yes	yes	yes	yes	yes	yes	yes	yes	yes	yes	yes	no	yes
H26078	Patient 9	Patient 9_H26078	2011-04-04	1-18	1076	Burn unit	yes	no	yes	yes	no	yes	yes	yes	yes	yes	yes	yes	yes	yes	yes	yes	yes	yes	yes	yes	yes	yes	yes	yes	yes	yes	yes	yes	yes	yes	yes	yes	yes	yes	yes	yes	yes	yes	yes	yes	yes	no	yes
H26166	Patient 22	Patient 22_H26166	2012-04-22	1-18	1076	Burn unit	yes	no	yes	yes	no	yes	yes	yes	yes	yes	yes	yes	yes	yes	yes	yes	yes	yes	yes	yes	yes	yes	yes	yes	yes	yes	yes	yes	yes	yes	yes	yes	yes	yes	yes	yes	yes	yes	yes	yes	yes	no	yes
H26188	Patient 22	Patient 22_H26188	2012-05-03	1-18	1076	Burn unit	yes	no	yes	yes	no	yes	yes	yes	yes	yes	yes	yes	yes	yes	yes	yes	yes	yes	yes	yes	yes	yes	yes	yes	yes	yes	yes	yes	yes	yes	yes	yes	yes	yes	yes	yes	yes	yes	yes	yes	yes	no	yes
H26230	Patient 3	Patient 3_H26230	2010-08-15	1-18	1076	Burn unit	yes	no	yes	no	no	yes	yes	yes	yes	yes	yes	yes	yes	yes	yes	yes	yes	yes	yes	yes	yes	yes	yes	yes	yes	yes	yes	yes	yes	yes	yes	yes	yes	yes	yes	yes	yes	yes	yes	yes	yes	no	yes
H26408	Patient 4	Patient 4_H26408	2011-04-13	1-18	1076	Burn unit	yes	no	yes	yes	no	yes	yes	yes	yes	yes	yes	yes	yes	yes	yes	yes	yes	yes	yes	yes	yes	yes	yes	yes	yes	yes	yes	yes	yes	yes	yes	yes	yes	yes	yes	yes	yes	yes	yes	yes	yes	no	yes
H26410	Patient 4	Patient 4_H26410	2011-04-18	1-18	1076	Burn unit	yes	no	yes	yes	no	yes	yes	yes	yes	yes	yes	yes	yes	yes	yes	yes	yes	yes	yes	yes	yes	yes	yes	yes	yes	yes	yes	yes	yes	yes	yes	yes	yes	yes	yes	yes	yes	yes	yes	yes	yes	no	yes
H26413	Patient 15	Patient 15_H26413	2011-10-16	1-18	1076	Burn unit	yes	no	yes	yes	no	yes	yes	yes	yes	yes	yes	yes	yes	yes	yes	yes	yes	yes	yes	yes	yes	yes	yes	yes	yes	yes	yes	yes	yes	yes	yes	yes	yes	yes	yes	yes	yes	yes	yes	yes	yes	no	yes
H26420	Patient 17	Patient 17_H26420	2012-02-15	1-18	1076	Burn unit	yes	no	yes	yes	no	yes	yes	yes	yes	yes	yes	yes	yes	yes	yes	yes	yes	yes	yes	yes	yes	yes	yes	yes	yes	yes	yes	yes	yes	yes	yes	yes	yes	yes	yes	yes	yes	yes	yes	yes	yes	no	yes
H26482	Patient 24	Patient 24_H26482	2012-10-18	1-18	1076	Burn unit	yes	no	yes	yes	no	yes	yes	yes	yes	yes	yes	yes	yes	yes	yes	yes	yes	yes	yes	yes	yes	yes	yes	yes	yes	yes	yes	yes	yes	yes	yes	yes	yes	yes	yes	yes	yes	yes	yes	yes	yes	no	yes
H26490	Env. 11	Env. 11_H26490	2012-10-24	1-18	1076	Burn unit	yes	no	yes	yes	no	yes	yes	yes	yes	yes	yes	yes	yes	yes	yes	yes	yes	yes	yes	yes	yes	yes	yes	yes	yes	yes	yes	yes	yes	yes	yes	yes	yes	yes	yes	yes	yes	yes	yes	yes	yes	no	yes
H26795	Patient 1	Patient 1_H26795	2010-04-24	1-18	1076	Single	yes	no	yes	yes	no	yes	yes	yes	yes	yes	yes	yes	yes	yes	yes	yes	yes	yes	yes	yes	yes	yes	yes	yes	yes	yes	yes	yes	yes	yes	yes	yes	yes	yes	yes	yes	yes	yes	yes	yes	yes	no	yes
H26798	Patient 1	Patient 1_H26798	2010-03-31	1-18	1076	Single	yes	no	yes	yes	no	yes	yes	yes	yes	yes	yes	yes	yes	yes	yes	yes	yes	yes	yes	yes	yes	yes	yes	yes	yes	yes	yes	yes	yes	yes	yes	yes	yes	yes	yes	yes	yes	yes	yes	yes	yes	no	yes
H26927	Env. 12	Env. 12_H26927	2013-01-25	1-18	1076	Burn unit	yes	no	yes	yes	no	yes	yes	yes	yes	yes	yes	yes	yes	yes	yes	yes	yes	yes	yes	yes	yes	yes	yes	yes	yes	yes	yes	yes	yes	yes	yes	yes	yes	yes	yes	yes	yes	yes	yes	yes	yes	no	yes
H26928	Env. 13	Env. 13_H26928	2013-01-25	1-18	1076	Burn unit	yes	no	yes	yes	no	yes	yes	yes	yes	yes	yes	yes	yes	yes	yes	yes	yes	yes	yes	yes	yes	yes	yes	yes	yes	yes	yes	yes	yes	yes	yes	yes	yes	yes	yes	yes	yes	yes	yes	yes	yes	no	yes
H26929	Env. 14	Env. 14_H26929	2013-01-25	1-18	1076	Burn unit	yes	no	yes	yes	no	yes	yes	yes	yes	yes	yes	yes	yes	yes	yes	yes	yes	yes	yes	yes	yes	yes	yes	yes	yes	yes	yes	yes	yes	yes	yes	yes	yes	yes	yes	yes	yes	yes	yes	yes	yes	no	yes
H26931	Env. 15	Env. 15_H26931	2013-01-25	1-18	1076	Burn unit	yes	no	yes	yes	no	yes	yes	yes	yes	yes	yes	yes	yes	yes	yes	yes	yes	yes	yes	yes	yes	yes	yes	yes	yes	yes	yes	yes	yes	yes	yes	yes	yes	yes	yes	yes	yes	yes	yes	yes	yes	no	yes
H26932	Env. 16	Env. 16_H26932	2013-01-25	1-18	1076	Burn unit	yes	no	yes	yes	no	yes	yes	yes	yes	yes	yes	yes	yes	yes	yes	yes	yes	yes	yes	yes	yes	yes	yes	yes	yes	yes	yes	yes	yes	yes	yes	yes	yes	yes	yes	yes	yes	yes	yes	yes	yes	no	yes
H26934	Env. 17	Env. 17_H26934	2013-01-25	1-18	1076	Burn unit	yes	no	yes	yes	no	yes	yes	yes	yes	yes	yes	yes	yes	yes	yes	yes	yes	yes	yes	yes	yes	yes	yes	yes	yes	yes	yes	yes	yes	yes	yes	yes	yes	yes	yes	yes	yes	yes	yes	yes	yes	no	yes
H26935	Env. 18	Env. 18_H26935	2013-01-25	1-18	1076	Burn unit	yes	no	yes	yes	no	yes	yes	yes	yes	yes	yes	yes	yes	yes	yes	yes	yes	yes	yes	yes	yes	yes	yes	yes	yes	yes	yes	yes	yes	yes	yes	yes	yes	yes	yes	yes	yes	yes	yes	yes	yes	no	yes
H27450	Patient 24	Patient 24_H27450	2012-10-18	1-18	1076	Burn unit	yes	no	yes	no	no	yes	yes	yes	yes	yes	yes	yes	yes	yes	yes	yes	yes	yes	yes	yes	yes	yes	yes	yes	yes	yes	yes	yes	yes	yes	yes	yes	yes	yes	yes	yes	yes	yes	yes	yes	yes	no	yes
H27476	Patient 24	Patient 24_H27476	2012-10-25	1-18	1076	Burn unit	yes	no	yes	no	no	yes	yes	yes	yes	yes	yes	yes	yes	yes	yes	yes	yes	yes	yes	yes	yes	yes	yes	yes	yes	yes	yes	yes	yes	yes	yes	yes	yes	yes	yes	yes	yes	yes	yes	yes	yes	no	yes
H13893	Env. 1	Env. 1_H13893	2004-05-18	1-21	253	Single	yes	no	yes	yes	yes	yes	yes	yes	yes	yes	yes	yes	yes	yes	yes	yes	yes	yes	yes	yes	yes	yes	yes	yes	yes	yes	yes	yes	yes	yes	yes	yes	yes	yes	yes	yes	yes	yes	yes	yes	yes	yes	yes
H14442	Env. 2	Env. 2_H14442	2004-12-23	1-21	253	Single	yes	no	yes	yes	yes	yes	yes	yes	yes	yes	yes	yes	yes	yes	yes	yes	yes	yes	yes	yes	yes	yes	yes	yes	yes	yes	yes	yes	yes	yes	yes	yes	yes	yes	yes	yes	yes	yes	yes	yes	yes	yes	yes
H25167	Env. 3	Env. 3_H25167	2012-03-23	1-21	253	Single	yes	no	yes	yes	yes	yes	yes	yes	yes	yes	yes	yes	yes	yes	yes	yes	yes	yes	yes	yes	yes	yes	yes	yes	yes	yes	yes	yes	yes	yes	yes	yes	yes	yes	yes	yes	yes	yes	yes	yes	yes	no	yes
H25175	Env. 4	Env. 4_H25175	2012-03-23	1-21	253	Single	yes	no	yes	yes	yes	yes	yes	yes	yes	yes	yes	yes	yes	yes	yes	yes	yes	yes	yes	yes	yes	yes	yes	yes	yes	yes	yes	yes	yes	yes	yes	yes	yes	yes	yes	yes	yes	yes	yes	yes	yes	no	yes
H25209	Env. 5	Env. 5_H25209	2012-04-02	1-21	253	ICU2	yes	no	yes	yes	yes	yes	yes	yes	yes	yes	yes	yes	yes	yes	yes	yes	yes	yes	yes	yes	yes	yes	yes	yes	yes	yes	yes	yes	yes	yes	yes	yes	yes	yes	yes	yes	yes	yes	yes	yes	yes	yes	yes
H25308	Env. 6	Env. 6_H25308	2012-04-27	1-21	253	Single	yes	no	yes	yes	yes	yes	yes	yes	yes	yes	yes	yes	yes	yes	yes	yes	yes	yes	yes	yes	yes	yes	yes	yes	yes	yes	yes	yes	yes	yes	yes	yes	yes	yes	yes	yes	yes	yes	yes	yes	yes	no	yes
H25532	Patient 10	Patient 10_H25532	2012-03-31	1-21	253	ICU2	yes	no	yes	yes	yes	yes	yes	yes	yes	yes	yes	yes	yes	yes	yes	yes	yes	yes	yes	yes	yes	yes	yes	yes	yes	yes	yes	yes	yes	yes	yes	yes	yes	yes	yes	yes	yes	yes	yes	yes	yes	yes	yes
H25575	Patient 9	Patient 9_H25575	2012-03-13	1-21	253	Single	yes	no	yes	yes	yes	yes	yes	yes	yes	yes	yes	yes	yes	yes	yes	yes	yes	yes	yes	yes	yes	yes	yes	yes	yes	yes	yes	yes	yes	yes	yes	yes	yes	yes	yes	yes	yes	yes	yes	yes	yes	no	yes
H25581	Patient 6	Patient 6_H25581	2011-02-28	1-21	253	Single	yes	no	yes	yes	yes	yes	yes	yes	yes	yes	yes	yes	yes	yes	yes	yes	yes	yes	yes	yes	yes	yes	yes	yes	yes	yes	yes	yes	yes	yes	yes	yes	yes	yes	yes	yes	yes	yes	yes	yes	yes	yes	yes
H25601	Patient 6	Patient 6_H25601	2011-12-31	1-21	253	Single	yes	no	yes	yes	yes	yes	yes	yes	yes	yes	yes	yes	yes	yes	yes	yes	yes	yes	yes	yes	yes	yes	yes	yes	yes	yes	yes	yes	yes	yes	yes	yes	yes	yes	yes	yes	yes	yes	yes	yes	yes	yes	yes
H25634	Patient 11	Patient 11_H25634	2012-04-10	1-21	253	ICU2	yes	no	yes	yes	yes	yes	yes	yes	yes	yes	yes	yes	yes	yes	yes	yes	yes	yes	yes	yes	yes	yes	yes	yes	yes	yes	yes	yes	yes	yes	yes	yes	yes	yes	yes	yes	yes	yes	yes	yes	yes	yes	yes
H25710	Patient 7	Patient 7_H25710	2011-04-03	1-21	253	Single	yes	no	yes	yes	yes	yes	yes	yes	yes	yes	yes	yes	yes	yes	yes	yes	yes	yes	yes	yes	yes	yes	yes	yes	yes	yes	yes	yes	yes	yes	yes	yes	yes	yes	yes	yes	yes	yes	yes	yes	yes	no	yes
H25882	Patient 2	Patient 2_H25882	2010-05-03	1-21	253	Single	yes	no	yes	yes	yes	yes	yes	yes	yes	yes	yes	yes	yes	yes	yes	yes	yes	yes	yes	yes	yes	yes	yes	yes	yes	yes	yes	yes	yes	yes	yes	yes	yes	yes	yes	yes	yes	yes	yes	yes	yes	no	yes
H25897	Patient 4	Patient 4_H25897	2010-09-02	1-21	253	Single	yes	no	yes	yes	yes	yes	yes	yes	yes	yes	yes	yes	yes	yes	yes	yes	yes	yes	yes	yes	yes	yes	yes	yes	yes	yes	yes	yes	yes	yes	yes	yes	yes	yes	yes	yes	yes	yes	yes	yes	yes	yes	yes
H26023	Patient 1	Patient 1_H26023	2010-01-08	1-21	253	Single	yes	no	yes	yes	no	yes	yes	yes	yes	yes	yes	yes	yes	yes	yes	yes	yes	yes	yes	yes	yes	yes	yes	yes	yes	yes	yes	yes	yes	yes	yes	yes	yes	yes	yes	yes	yes	yes	yes	yes	yes	no	yes
H26031	Patient 2	Patient 2_H26031	2010-04-29	1-21	253	Single	yes	no	yes	yes	yes	yes	yes	yes	yes	yes	yes	yes	yes	yes	yes	yes	yes	yes	yes	yes	yes	yes	yes	yes	yes	yes	yes	yes	yes	yes	yes	yes	yes	yes	yes	yes	yes	yes	yes	yes	yes	no	yes
H26049	Patient 5	Patient 5_H26049	2010-10-27	1-21	253	Single	yes	no	yes	yes	yes	yes	yes	yes	yes	yes	yes	yes	yes	yes	yes	yes	yes	yes	yes	yes	yes	yes	yes	yes	yes	yes	yes	yes	yes	yes	yes	yes	yes	yes	yes	yes	yes	yes	yes	yes	yes	yes	yes
H26083	Patient 3	Patient 3_H26083	2010-05-18	1-21	253	Single	yes	no	yes	yes	yes	yes	yes	yes	yes	yes	yes	yes	yes	yes	yes	yes	yes	yes	yes	yes	yes	yes	yes	yes	yes	yes	yes	yes	yes	yes	yes	yes	yes	yes	yes	yes	yes	yes	yes	yes	yes	yes	yes
H26591	Env. 7	Env. 7_H26591	2012-11-13	1-21	253	Single	yes	no	yes	yes	yes	yes	yes	yes	yes	yes	yes	yes	yes	yes	yes	yes	yes	yes	yes	yes	yes	yes	yes	yes	yes	yes	yes	yes	yes	yes	yes	yes	yes	yes	yes	yes	yes	yes	yes	yes	yes	no	yes
H26615	Patient 12	Patient 12_H26615	2012-11-07	1-21	253	Single	yes	no	yes	yes	yes	yes	yes	yes	yes	yes	yes	yes	yes	yes	yes	yes	yes	yes	yes	yes	yes	yes	yes	yes	yes	yes	yes	yes	yes	yes	yes	yes	yes	yes	yes	yes	yes	yes	yes	yes	yes	yes	yes
H26662	Patient 13	Patient 13_H26662	2012-12-04	1-21	253	Single	yes	no	yes	yes	yes	yes	yes	yes	yes	yes	yes	yes	yes	yes	yes	yes	yes	yes	yes	yes	yes	yes	yes	yes	yes	yes	yes	yes	yes	yes	yes	yes	yes	yes	yes	yes	yes	yes	no	yes	yes	yes	yes
H26677	Env. 8	Env. 8_H26677	2012-12-07	1-21	253	Single	yes	no	yes	yes	yes	yes	yes	yes	yes	yes	yes	yes	yes	yes	yes	yes	yes	yes	yes	yes	yes	yes	yes	yes	yes	yes	yes	yes	yes	yes	yes	yes	yes	yes	yes	yes	yes	yes	yes	yes	yes	no	yes
H26782	Patient 8	Patient 8_H26782	2011-12-08	1-21	253	Single	yes	no	yes	yes	yes	yes	yes	yes	yes	yes	yes	yes	yes	yes	yes	yes	yes	yes	yes	yes	yes	yes	yes	yes	yes	yes	yes	yes	yes	yes	yes	yes	yes	yes	yes	yes	yes	yes	yes	yes	yes	yes	yes
H26926	Env. 11	Env. 11_H26926	2013-01-25	1-21	253	Single	yes	no	yes	yes	yes	yes	yes	yes	yes	yes	yes	yes	yes	yes	yes	yes	yes	yes	yes	yes	yes	yes	yes	yes	yes	yes	yes	yes	yes	yes	yes	yes	yes	yes	yes	yes	yes	yes	yes	yes	yes	no	yes
H26930	Env. 10	Env. 10_H26930	2013-01-25	1-21	253	Single	yes	no	yes	yes	yes	yes	yes	yes	yes	yes	yes	yes	yes	yes	yes	yes	yes	yes	yes	yes	yes	yes	yes	yes	yes	yes	yes	yes	yes	yes	yes	yes	yes	yes	yes	yes	yes	yes	yes	yes	yes	no	yes
H26933	Env. 9	Env. 9_H26933	2013-01-25	1-21	253	Single	yes	no	yes	yes	yes	yes	yes	yes	yes	yes	yes	yes	yes	yes	yes	yes	yes	yes	yes	yes	yes	yes	yes	yes	yes	yes	yes	yes	yes	yes	yes	yes	yes	yes	yes	yes	yes	yes	yes	yes	yes	no	yes
H26973	Patient 14	Patient 14_H26973	2013-02-02	1-21	253	Single	yes	no	yes	yes	yes	yes	yes	yes	yes	yes	yes	yes	yes	yes	yes	yes	yes	yes	yes	yes	yes	yes	yes	yes	yes	yes	yes	yes	yes	yes	yes	yes	yes	yes	yes	yes	yes	yes	yes	yes	yes	no	yes
H27714	Env. 12	Env. 12_H27714	2013-03-07	1-21	253	Single	yes	no	yes	yes	no	yes	yes	yes	yes	yes	yes	yes	yes	yes	yes	yes	yes	yes	yes	yes	yes	yes	yes	yes	yes	yes	yes	yes	yes	yes	yes	yes	yes	yes	yes	yes	yes	yes	yes	yes	yes	no	yes
H28128	Env. 13	Env. 13_H28128	2013-05-29	1-21	253	Single	yes	no	yes	yes	yes	yes	yes	yes	yes	yes	yes	yes	yes	yes	yes	yes	yes	yes	yes	yes	yes	yes	yes	yes	yes	yes	yes	yes	yes	yes	yes	yes	yes	yes	yes	yes	yes	yes	yes	yes	yes	no	yes
H30236	Patient 15	Patient 15_H30236	2014-08-08	1-21	253	Single	yes	no	yes	yes	yes	yes	yes	yes	yes	yes	yes	yes	yes	yes	yes	yes	yes	yes	yes	yes	yes	yes	yes	yes	yes	yes	yes	yes	yes	yes	yes	yes	yes	yes	yes	yes	yes	yes	yes	yes	yes	no	yes
H30280	Patient 16	Patient 16_H30280	2014-09-01	1-21	253	Single	yes	no	yes	yes	yes	yes	yes	yes	yes	yes	yes	yes	yes	yes	yes	yes	yes	yes	yes	yes	yes	yes	yes	yes	yes	yes	yes	yes	yes	yes	yes	yes	yes	yes	yes	yes	yes	yes	yes	yes	yes	yes	yes
H24436	Env 1	Env. 1_H24436	2011-10-10	6-7	845	ICU2	yes	no	yes	yes	yes	yes	yes	yes	yes	yes	yes	yes	yes	yes	yes	yes	yes	yes	yes	yes	yes	yes	yes	yes	yes	yes	yes	yes	yes	yes	yes	yes	yes	yes	yes	yes	yes	yes	yes	yes	yes	no	yes
H24447	Env 2	Env. 2_H24447	2011-10-10	6-7	17	ICU3	yes	no	yes	yes	yes	yes	yes	yes	yes	yes	yes	yes	yes	yes	yes	yes	yes	yes	yes	yes	yes	yes	yes	yes	yes	yes	yes	yes	yes	yes	yes	yes	yes	yes	yes	yes	yes	yes	yes	yes	yes	no	yes
H25200	Env 3	Env. 3_H25200	2012-04-02	6-7	17	ICU2	yes	no	yes	yes	yes	yes	yes	yes	yes	yes	yes	yes	yes	yes	yes	yes	yes	yes	yes	yes	yes	yes	yes	yes	yes	yes	yes	yes	yes	yes	yes	yes	yes	yes	yes	yes	yes	yes	yes	yes	yes	no	yes
H25213	Env 4	Env. 4_H25213	2012-04-03	6-7	17	Single	yes	no	yes	yes	yes	yes	yes	yes	yes	yes	yes	yes	yes	yes	yes	yes	yes	yes	yes	yes	yes	yes	yes	yes	yes	yes	yes	yes	yes	yes	yes	yes	yes	yes	yes	yes	yes	yes	yes	yes	yes	no	yes
H25284	Env 5	Env. 5_H25284	2012-04-27	6-7	17	Single	yes	no	yes	yes	yes	yes	yes	yes	yes	yes	yes	yes	yes	yes	yes	yes	yes	yes	yes	yes	yes	yes	yes	yes	yes	yes	yes	yes	yes	yes	yes	yes	yes	yes	yes	yes	yes	yes	yes	yes	yes	no	yes
H25298	Env 6	Env. 6_H25298	2012-04-27	6-7	17	Single	yes	no	yes	no	yes	yes	yes	yes	yes	yes	yes	yes	yes	yes	yes	yes	yes	yes	yes	yes	yes	yes	yes	yes	yes	yes	yes	yes	yes	yes	yes	yes	yes	yes	yes	yes	yes	yes	yes	yes	yes	no	yes
H25508	Patient 11	Patient 11_H25508	2011-12-06	6-7	17	Single	yes	no	yes	yes	yes	yes	yes	yes	yes	yes	yes	yes	yes	yes	yes	yes	yes	yes	yes	yes	yes	yes	yes	yes	yes	yes	yes	yes	yes	yes	yes	yes	yes	yes	yes	yes	yes	yes	yes	yes	yes	no	yes
H25632	Patient 12	Patient 12_H25632	2012-05-04	6-7	17	Single	yes	yes	yes	yes	yes	yes	yes	yes	yes	yes	yes	yes	yes	yes	yes	yes	yes	yes	yes	yes	yes	yes	yes	yes	yes	yes	yes	yes	yes	yes	yes	yes	yes	yes	yes	yes	yes	yes	yes	yes	yes	no	yes
H25718	Patient 7	Patient 7_H25718	2011-04-19	6-7	17	Single	yes	no	yes	yes	yes	yes	yes	yes	yes	yes	yes	yes	yes	yes	yes	yes	yes	yes	yes	yes	yes	yes	yes	yes	yes	yes	yes	yes	yes	yes	yes	yes	yes	yes	yes	yes	yes	yes	yes	yes	yes	no	yes
H25723	Patient 7	Patient 7_H25723	2011-05-04	6-7	17	Single	yes	no	yes	yes	yes	yes	yes	yes	yes	yes	yes	yes	yes	yes	yes	yes	yes	yes	yes	yes	yes	yes	yes	yes	yes	yes	yes	yes	yes	yes	yes	yes	yes	yes	yes	yes	yes	yes	yes	yes	yes	no	yes
H25785	Env 7	Env. 7_H25785	2012-07-17	6-7	17	Single	yes	no	yes	yes	yes	yes	yes	yes	yes	yes	yes	yes	yes	yes	yes	yes	yes	yes	yes	yes	yes	yes	yes	yes	yes	yes	yes	yes	yes	yes	yes	yes	yes	yes	yes	yes	yes	yes	yes	yes	yes	no	yes
H25787	Env 8	Env. 8_H25787	2012-07-17	6-7	17	Single	yes	no	yes	yes	yes	yes	yes	yes	yes	yes	yes	yes	yes	yes	yes	yes	yes	yes	yes	yes	yes	yes	yes	yes	yes	yes	yes	yes	yes	yes	yes	yes	yes	yes	yes	yes	yes	yes	yes	yes	yes	no	yes
H25889	Patient 3	Patient 3_H25889	2010-07-25	6-7	17	Burn unit	yes	no	yes	yes	yes	yes	yes	yes	yes	yes	yes	yes	yes	yes	yes	yes	yes	yes	yes	yes	yes	yes	yes	yes	yes	yes	yes	yes	yes	yes	yes	yes	yes	yes	yes	yes	yes	yes	yes	yes	yes	no	yes
H25900	Patient 6	Patient 6_H25900	2010-09-16	6-7	17	Single	yes	no	yes	yes	yes	yes	yes	yes	yes	yes	yes	yes	yes	yes	yes	yes	yes	yes	yes	yes	yes	yes	yes	yes	yes	yes	yes	yes	yes	yes	yes	yes	yes	yes	yes	yes	yes	yes	yes	yes	yes	no	yes
H25908	Patient 7	Patient 7_H25908	2011-05-21	6-7	17	Single	yes	no	yes	yes	yes	yes	yes	yes	yes	yes	yes	yes	yes	yes	yes	yes	yes	yes	yes	yes	yes	yes	yes	yes	yes	yes	yes	yes	yes	yes	yes	yes	yes	yes	yes	yes	yes	yes	yes	yes	yes	no	yes
H25952	Patient 8	Patient 8_H25952	2011-07-21	6-7	17	Single	yes	no	yes	yes	yes	yes	yes	yes	yes	yes	yes	yes	yes	yes	yes	yes	yes	yes	yes	yes	yes	yes	yes	yes	yes	yes	yes	yes	yes	yes	yes	yes	yes	yes	yes	yes	yes	yes	yes	yes	yes	no	yes
H25961	Env 9	Env. 9_H25961	2012-07-30	6-7	17	Single	yes	no	yes	yes	yes	yes	yes	yes	yes	yes	yes	yes	yes	yes	yes	yes	yes	yes	yes	yes	yes	yes	yes	yes	yes	yes	yes	yes	yes	yes	yes	yes	yes	yes	yes	yes	yes	yes	yes	yes	yes	no	yes
H25979	Patient 5	Patient 5_H25979	2010-09-10	6-7	17	Burn unit	yes	no	yes	yes	yes	yes	yes	yes	yes	yes	yes	yes	yes	yes	yes	yes	yes	yes	yes	yes	yes	yes	yes	yes	yes	yes	yes	yes	yes	yes	yes	yes	yes	yes	yes	yes	yes	yes	yes	yes	yes	no	yes
H25984	Patient 10	Patient 10_H25984	2011-08-26	6-7	17	Single	yes	no	yes	yes	yes	yes	yes	yes	yes	yes	yes	yes	yes	yes	yes	yes	yes	yes	yes	yes	yes	yes	yes	yes	yes	yes	yes	yes	yes	yes	yes	yes	yes	yes	yes	yes	yes	yes	yes	yes	yes	no	yes
H26027	Patient 1	Patient 1_H26027	2010-04-06	6-7	17	Burn unit	yes	no	yes	yes	yes	yes	yes	yes	yes	yes	yes	yes	yes	yes	yes	yes	yes	yes	yes	yes	yes	yes	yes	yes	yes	yes	yes	yes	yes	yes	yes	yes	yes	yes	yes	yes	yes	yes	yes	yes	yes	no	yes
H26036	Patient 2	Patient 2_H26036	2010-06-20	6-7	17	Burn unit	yes	no	yes	yes	yes	yes	yes	yes	yes	yes	yes	yes	yes	yes	yes	yes	yes	yes	yes	yes	yes	yes	yes	yes	yes	yes	yes	yes	yes	yes	yes	yes	yes	yes	yes	yes	yes	yes	yes	yes	yes	no	yes
H26042	Patient 4	Patient 4_H26042	2010-08-03	6-7	17	Burn unit	yes	no	yes	yes	yes	yes	yes	yes	yes	yes	yes	yes	yes	yes	yes	yes	yes	yes	yes	yes	yes	yes	yes	yes	yes	yes	yes	yes	yes	yes	yes	yes	yes	yes	yes	yes	yes	yes	yes	yes	yes	no	yes
H26044	Patient 5	Patient 5_H26044	2010-08-15	6-7	17	Burn unit	yes	no	yes	no	yes	yes	yes	yes	yes	yes	yes	yes	yes	yes	yes	yes	yes	yes	yes	yes	yes	yes	yes	yes	yes	yes	yes	yes	yes	yes	yes	yes	yes	yes	yes	yes	yes	yes	yes	yes	yes	no	yes
H26046	Patient 4	Patient 4_H26046	2010-08-30	6-7	17	Burn unit	yes	no	yes	yes	yes	yes	yes	yes	yes	yes	yes	yes	yes	yes	yes	yes	yes	yes	yes	yes	yes	yes	yes	yes	yes	yes	yes	yes	yes	yes	yes	yes	yes	yes	yes	yes	yes	yes	yes	yes	yes	no	yes
H26084	Patient 2	Patient 2_H26084	2010-06-02	6-7	17	Burn unit	yes	no	yes	yes	yes	yes	yes	yes	yes	yes	yes	yes	yes	yes	yes	yes	yes	yes	yes	yes	yes	yes	yes	yes	yes	yes	yes	yes	yes	yes	yes	yes	yes	yes	yes	yes	yes	yes	yes	yes	yes	no	yes
H26086	Patient 2	Patient 2_H26086	2010-07-10	6-7	17	Burn unit	yes	no	yes	yes	yes	yes	yes	yes	yes	yes	yes	yes	yes	yes	yes	yes	yes	yes	yes	yes	yes	yes	yes	yes	yes	yes	yes	yes	yes	yes	yes	yes	yes	yes	yes	yes	yes	yes	yes	yes	yes	no	yes
H26202	Patient 2	Patient 2_H26202	2010-06-18	6-7	17	Burn unit	yes	no	yes	yes	yes	yes	yes	yes	yes	yes	yes	yes	yes	yes	yes	yes	yes	yes	yes	yes	yes	yes	yes	yes	yes	yes	yes	yes	yes	yes	yes	yes	yes	yes	yes	yes	yes	yes	yes	yes	yes	no	yes
H26203	Patient 2	Patient 2_H26203	2010-06-18	6-7	17	Burn unit	yes	no	yes	yes	yes	yes	yes	yes	yes	yes	yes	yes	yes	yes	yes	yes	yes	yes	yes	yes	yes	yes	yes	yes	yes	yes	yes	yes	yes	yes	yes	yes	yes	yes	yes	yes	yes	yes	yes	yes	yes	no	yes
H26247	Patient 11	Patient 11_H26247	2011-11-18	6-7	17	Single	yes	no	yes	yes	yes	yes	yes	yes	yes	yes	yes	yes	yes	yes	yes	yes	yes	yes	yes	yes	yes	yes	yes	yes	yes	yes	yes	yes	yes	yes	yes	yes	yes	yes	yes	yes	yes	yes	yes	yes	yes	no	yes
H26260	Patient 9	Patient 9_H26260	2011-07-30	6-7	17	Single	yes	no	yes	yes	yes	yes	yes	yes	yes	yes	yes	yes	yes	yes	yes	yes	yes	yes	yes	yes	yes	yes	yes	yes	yes	yes	yes	yes	yes	yes	yes	yes	yes	yes	yes	yes	yes	yes	yes	yes	yes	no	yes
H26375	Patient 13	Patient 13_H26375	2012-09-26	6-7	17	Single	yes	no	yes	yes	yes	yes	yes	yes	yes	yes	yes	yes	yes	yes	yes	yes	yes	yes	yes	yes	yes	yes	yes	yes	yes	yes	yes	yes	yes	yes	yes	yes	yes	yes	yes	yes	yes	yes	yes	yes	yes	no	yes
H26416	Patient 11	Patient 11_H26416	2011-11-07	6-7	17	Single	yes	no	yes	yes	yes	yes	yes	yes	yes	yes	yes	yes	yes	yes	yes	yes	yes	yes	yes	yes	yes	yes	yes	yes	yes	yes	yes	yes	yes	yes	yes	yes	yes	yes	yes	yes	yes	yes	yes	yes	yes	no	yes
H26426	Patient 13	Patient 13_H26426	2012-10-07	6-7	17	Single	yes	no	yes	yes	yes	yes	yes	yes	yes	yes	yes	yes	yes	yes	yes	yes	yes	yes	yes	yes	yes	yes	yes	yes	yes	yes	yes	yes	yes	yes	yes	yes	yes	yes	yes	yes	yes	yes	yes	yes	yes	no	yes
H26524	Env 10	Env. 10_H26524	2012-11-07	6-7	17	Single	yes	no	yes	yes	yes	yes	yes	yes	yes	yes	yes	yes	yes	yes	yes	yes	yes	yes	yes	yes	yes	yes	yes	yes	yes	yes	yes	yes	yes	yes	yes	yes	yes	yes	yes	yes	yes	yes	yes	yes	yes	no	yes
H26532	Env 11	Env. 11_H26532	2012-11-07	6-7	17	Single	yes	no	yes	no	yes	yes	yes	yes	yes	yes	yes	yes	yes	yes	yes	yes	yes	yes	yes	yes	yes	yes	yes	yes	yes	yes	yes	yes	yes	yes	yes	yes	yes	yes	yes	yes	yes	yes	yes	yes	yes	no	yes
H26571	Env 12	Env. 12_H26571	2012-11-08	6-7	17	Single	yes	no	yes	yes	yes	yes	yes	yes	yes	yes	yes	yes	yes	yes	yes	yes	yes	yes	yes	yes	yes	yes	yes	yes	yes	yes	yes	yes	yes	yes	yes	yes	yes	yes	yes	yes	yes	yes	yes	yes	yes	no	yes
H26722	Env 13	Env. 13_H26722	2012-12-11	6-7	17	Single	yes	no	yes	yes	yes	yes	yes	yes	yes	yes	yes	yes	yes	yes	yes	yes	yes	yes	yes	yes	yes	yes	yes	yes	yes	yes	yes	yes	yes	yes	yes	yes	yes	yes	yes	yes	yes	yes	yes	yes	yes	no	yes
H26760	Patient 14	Patient 14_H26760	2012-12-12	6-7	17	Single	yes	no	yes	yes	yes	yes	yes	yes	yes	yes	yes	yes	yes	yes	yes	yes	yes	yes	yes	yes	yes	yes	yes	yes	yes	yes	yes	yes	yes	yes	yes	yes	yes	yes	yes	yes	yes	yes	yes	yes	yes	no	yes
H27791	Env 14	Env. 14_H27791	2013-03-20	6-7	17	Single	yes	no	yes	yes	yes	yes	yes	yes	yes	yes	yes	yes	yes	yes	yes	yes	yes	yes	yes	yes	yes	yes	yes	yes	yes	yes	yes	yes	yes	yes	yes	yes	yes	yes	yes	yes	yes	yes	yes	yes	yes	no	yes
H27846	Patient 15	Patient 15_H27846	2013-03-21	6-7	17	Single	yes	no	yes	yes	yes	yes	yes	yes	yes	yes	yes	yes	yes	yes	yes	yes	yes	yes	yes	yes	yes	yes	yes	yes	yes	yes	yes	yes	yes	yes	yes	yes	yes	yes	yes	yes	yes	yes	yes	yes	yes	no	yes
H27995	Patient 15	Patient 15_H27995	2013-04-09	6-7	17	Single	yes	no	yes	no	yes	yes	yes	yes	yes	yes	yes	yes	yes	yes	yes	yes	yes	yes	yes	yes	yes	yes	yes	yes	yes	yes	yes	yes	yes	yes	yes	yes	yes	yes	yes	yes	yes	yes	yes	yes	yes	no	yes
H28085	Patient 16	Patient 16_H28085	2013-05-17	6-7	17	Single	yes	no	yes	yes	yes	yes	yes	yes	yes	yes	yes	yes	yes	yes	yes	yes	yes	yes	yes	yes	yes	yes	yes	yes	yes	yes	yes	yes	yes	yes	yes	yes	yes	yes	yes	yes	yes	yes	yes	yes	yes	no	yes
H28167	Patient 17	Patient 17_H28167	2013-05-30	6-7	17	Single	yes	no	yes	yes	yes	yes	yes	yes	yes	yes	yes	yes	yes	yes	yes	yes	yes	yes	yes	yes	yes	yes	yes	yes	yes	yes	yes	yes	yes	yes	yes	yes	yes	yes	yes	yes	yes	yes	yes	yes	yes	no	yes
H29477	Patient 18	Patient 18_H29477	2014-01-10	6-7	17	Single	yes	no	yes	yes	yes	yes	yes	yes	yes	yes	yes	yes	yes	yes	yes	yes	yes	yes	yes	yes	yes	yes	yes	yes	yes	yes	yes	yes	yes	yes	yes	yes	yes	yes	yes	yes	yes	yes	yes	yes	yes	no	yes
H29762	Env 15	Env. 15_H29762	2014-03-04	6-7	17	Single	yes	no	yes	yes	yes	yes	yes	yes	yes	yes	yes	yes	yes	yes	yes	yes	yes	yes	yes	yes	yes	yes	yes	yes	yes	yes	yes	yes	yes	yes	yes	yes	yes	yes	yes	yes	yes	yes	yes	yes	yes	no	yes
H29924	Patient 19	Patient 19_H29924	2014-04-26	6-7	17	Single	yes	no	yes	yes	yes	yes	yes	yes	yes	yes	yes	yes	yes	yes	yes	yes	yes	yes	yes	yes	yes	yes	yes	yes	yes	yes	yes	yes	yes	yes	yes	yes	yes	yes	yes	yes	yes	yes	yes	yes	yes	no	yes
H30429	Patient 20	Patient 20_H30429	2014-10-13	6-7	17	Single	yes	no	yes	yes	yes	yes	yes	yes	yes	yes	yes	yes	yes	yes	yes	yes	yes	yes	yes	yes	yes	yes	yes	yes	yes	yes	yes	yes	yes	yes	yes	yes	yes	yes	yes	yes	yes	yes	yes	yes	yes	no	yes
H30438	Patient 21	Patient 21_H30438	2014-10-15	6-7	17	Single	yes	no	yes	no	yes	yes	yes	yes	yes	yes	yes	yes	yes	yes	yes	yes	yes	yes	yes	yes	yes	yes	yes	yes	yes	yes	yes	yes	yes	yes	yes	yes	yes	yes	yes	yes	yes	yes	yes	yes	yes	no	yes
[truncated: 28 more columns]

## Sheet: SRST2_VFDB
Isolate #	Patient #	Patient_Isolate	Sample_date	DLST	MLST	Outbreak	PA14_23400	PA14_23420	PA14_23430	PA2372	PA2383	PA2384	PA2760	PA3142	PA3143	PA3144	PA3157	PA4298	PA4541	PA5112	PFL_6088	PSPA7_1986	Pmen_2322	alg44	alg8	algA	algB	algC	algD	algE	algF	algG	algI	algJ	algK	algL	algP/algR3	algQ	algR	algU	algW	algX	algZ	aprA	cheA	cheB	cheR	cheV	cheY
H25179	Env. 6	Env. 6_H25179	2012-03-23	1-18	1076	Single	no	no	no	no	yes	yes	yes	no	no	no	no	yes	yes	yes	yes	yes	no	yes	yes	yes	yes	yes	yes	yes	yes	yes	yes	yes	yes	yes	yes	yes	yes	yes	yes	yes	yes	yes	yes	yes	yes	yes	yes
H25525	Patient 21	Patient 21_H25525	2012-03-04	1-18	1076	Single	no	no	no	no	yes	yes	yes	no	no	no	no	yes	yes	yes	no	no	no	yes	yes	yes	yes	yes	yes	yes	yes	yes	yes	yes	yes	yes	yes	yes	yes	yes	yes	yes	yes	yes	yes	yes	yes	yes	yes
H25792	Patient 18	Patient 18_H25792	2011-12-11	1-18	1076	Single	no	no	no	no	yes	yes	yes	no	no	no	no	yes	yes	yes	yes	yes	no	yes	yes	yes	yes	yes	yes	yes	yes	yes	yes	yes	yes	yes	yes	yes	yes	yes	yes	yes	yes	yes	yes	yes	yes	yes	yes
H26063	Patient 5	Patient 5_H26063	2011-01-24	1-18	1076	Single	no	no	no	no	yes	yes	yes	no	no	no	no	yes	yes	yes	yes	yes	no	yes	yes	yes	yes	yes	yes	yes	yes	yes	yes	yes	yes	yes	yes	yes	yes	yes	yes	yes	yes	yes	yes	yes	yes	yes	yes
H26166	Patient 22	Patient 22_H26166	2012-04-22	1-18	1076	Single	no	no	no	no	yes	yes	yes	no	no	no	no	yes	yes	yes	yes	yes	no	yes	yes	yes	yes	yes	yes	yes	yes	yes	yes	yes	yes	yes	yes	yes	yes	yes	yes	yes	yes	yes	yes	yes	yes	yes	yes
H25644	Patient 21	Patient 21_H25644	2012-03-22	1-18	1076	Single	no	no	no	no	yes	yes	yes	no	no	no	no	no	yes	yes	yes	yes	no	yes	yes	yes	yes	yes	yes	yes	yes	yes	yes	yes	yes	yes	yes	yes	yes	yes	yes	yes	yes	yes	yes	yes	yes	yes	yes
H26929	Env. 14	Env. 14_H26929	2013-01-25	1-18	1076	Single	no	no	no	no	yes	yes	yes	no	no	no	no	yes	yes	yes	no	yes	no	yes	yes	yes	yes	yes	yes	yes	yes	yes	yes	yes	yes	yes	yes	yes	yes	yes	yes	yes	yes	yes	yes	yes	yes	yes	yes
H25529	Patient 20	Patient 20_H25529	2012-03-13	1-18	1076	Single	no	no	no	no	yes	yes	yes	no	no	no	no	yes	yes	yes	yes	yes	no	yes	yes	yes	yes	yes	yes	yes	yes	yes	yes	yes	yes	yes	yes	yes	yes	yes	yes	yes	yes	yes	yes	yes	yes	yes	yes
H25706	Patient 8	Patient 8_H25706	2011-03-13	1-18	1076	Single	no	no	no	no	yes	yes	yes	no	no	no	no	yes	yes	yes	yes	yes	no	yes	yes	yes	yes	yes	yes	yes	yes	yes	yes	yes	yes	yes	yes	yes	yes	yes	yes	yes	yes	yes	yes	yes	yes	yes	yes
H25721	Patient 10	Patient 10_H25721	2011-05-02	1-18	1076	Single	no	no	no	no	no	yes	yes	no	no	no	no	no	yes	yes	yes	yes	no	yes	yes	yes	yes	yes	yes	yes	yes	yes	yes	yes	yes	yes	yes	yes	yes	yes	yes	yes	yes	yes	no	yes	yes	yes	yes
H25509	Patient 17	Patient 17_H25509	2012-12-08	1-18	1076	Single	no	no	no	no	yes	yes	yes	no	no	no	no	yes	yes	yes	yes	yes	no	yes	yes	yes	yes	yes	yes	yes	yes	yes	yes	yes	yes	yes	yes	yes	yes	yes	yes	yes	yes	yes	yes	yes	yes	yes	yes
H25688	Patient 9	Patient 9_H25688	2011-05-18	1-18	1076	Single	no	no	no	no	yes	yes	yes	no	no	no	no	yes	yes	yes	yes	yes	no	yes	yes	yes	yes	yes	yes	yes	yes	yes	yes	yes	yes	yes	yes	yes	yes	yes	yes	yes	yes	yes	yes	yes	yes	yes	yes
H25524	Patient 20	Patient 20_H25524	2012-02-27	1-18	1076	Single	no	no	no	no	yes	yes	yes	no	no	no	no	yes	yes	yes	yes	yes	no	yes	yes	yes	yes	yes	yes	yes	yes	yes	yes	yes	yes	yes	yes	yes	yes	yes	yes	yes	yes	yes	yes	yes	yes	yes	yes
H26928	Env. 13	Env. 13_H26928	2013-01-25	1-18	1076	Single	no	no	no	no	yes	yes	yes	no	no	no	no	yes	yes	yes	yes	yes	no	yes	yes	yes	yes	yes	yes	yes	yes	yes	yes	yes	yes	yes	yes	yes	yes	yes	yes	yes	yes	yes	yes	yes	yes	yes	yes
H25784	Env. 9	Env. 9_H25784	2012-07-17	1-18	1076	Single	no	no	no	no	yes	yes	yes	no	no	no	no	yes	yes	yes	yes	yes	no	yes	yes	yes	yes	yes	yes	yes	yes	yes	yes	yes	yes	yes	yes	yes	yes	yes	yes	yes	yes	yes	yes	yes	yes	yes	yes
H26927	Env. 12	Env. 12_H26927	2013-01-25	1-18	1076	Single	no	no	no	no	yes	yes	yes	no	no	no	no	yes	yes	yes	no	yes	no	yes	yes	yes	yes	yes	yes	yes	yes	yes	yes	yes	yes	yes	yes	yes	yes	yes	yes	yes	yes	yes	yes	yes	yes	yes	yes
H25954	Patient 14	Patient 14_H25954	2011-10-10	1-18	1076	Single	no	no	no	no	yes	yes	yes	no	no	no	no	yes	yes	yes	no	no	no	yes	yes	yes	yes	yes	yes	yes	yes	yes	yes	yes	yes	yes	yes	yes	yes	yes	yes	yes	yes	yes	yes	yes	yes	yes	yes
H25469	Patient 21	Patient 21_H25469	2012-03-18	1-18	1076	Single	no	no	no	no	yes	yes	yes	no	no	no	no	yes	yes	yes	yes	yes	no	yes	yes	yes	yes	yes	yes	yes	yes	yes	yes	yes	yes	yes	yes	yes	yes	yes	yes	yes	yes	yes	yes	yes	yes	yes	yes
H25841	Env. 10	Env. 10_H25841	2012-07-27	1-18	1076	Single	no	no	no	no	yes	yes	yes	no	no	no	no	yes	yes	yes	no	yes	no	yes	yes	yes	yes	yes	yes	yes	yes	yes	yes	yes	yes	yes	yes	yes	yes	yes	yes	yes	yes	yes	yes	yes	yes	yes	yes
H26073	Patient 4	Patient 4_H26073	2011-03-01	1-18	1076	Single	no	no	no	no	yes	yes	yes	no	no	no	no	yes	yes	yes	no	yes	no	yes	yes	yes	yes	yes	yes	yes	yes	yes	yes	yes	yes	yes	yes	yes	yes	yes	yes	yes	yes	yes	yes	yes	yes	yes	yes
H27450	Patient 24	Patient 24_H27450	2012-10-18	1-18	1076	Single	no	no	no	no	yes	yes	yes	no	no	no	no	yes	yes	yes	no	no	no	yes	yes	yes	yes	yes	yes	yes	yes	yes	yes	yes	yes	yes	yes	yes	yes	yes	yes	yes	yes	yes	yes	yes	yes	yes	yes
H26076	Patient 9	Patient 9_H26076	2011-03-21	1-18	1076	Single	no	no	no	no	yes	yes	yes	no	no	no	no	yes	yes	yes	no	no	no	yes	yes	yes	yes	yes	yes	yes	yes	yes	yes	yes	yes	yes	yes	yes	yes	yes	yes	yes	yes	yes	yes	yes	yes	yes	yes
H25731	Patient 13	Patient 13_H25731	2011-07-14	1-18	1076	Single	no	no	no	no	no	yes	yes	no	no	no	no	no	yes	yes	yes	yes	no	yes	yes	yes	yes	yes	yes	yes	yes	yes	yes	yes	yes	yes	yes	yes	yes	yes	yes	yes	yes	yes	yes	yes	yes	yes	yes
H25727	Patient 12	Patient 12_H25727	2011-06-26	1-18	1076	Single	no	no	no	no	yes	yes	yes	no	no	no	no	yes	yes	yes	yes	yes	no	yes	yes	yes	yes	yes	yes	yes	yes	yes	yes	yes	yes	yes	yes	yes	yes	yes	yes	yes	yes	yes	yes	yes	yes	yes	yes
H26482	Patient 24	Patient 24_H26482	2012-10-18	1-18	1076	Single	no	no	no	no	yes	yes	yes	no	no	no	no	yes	yes	yes	yes	yes	no	yes	yes	yes	yes	yes	yes	yes	yes	yes	yes	yes	yes	yes	yes	yes	yes	yes	yes	yes	yes	yes	yes	yes	yes	yes	yes
H25982	Patient 9	Patient 9_H25982	2011-07-01	1-18	1076	Single	no	no	no	no	yes	yes	yes	no	no	no	no	yes	yes	yes	yes	yes	no	yes	yes	yes	yes	yes	yes	yes	yes	yes	yes	yes	yes	yes	yes	yes	yes	yes	yes	yes	yes	yes	yes	yes	yes	yes	yes
H25905	Patient 4	Patient 4_H25905	2011-05-10	1-18	1076	Single	no	no	no	no	yes	yes	yes	no	no	no	no	yes	yes	yes	yes	yes	no	yes	yes	yes	yes	yes	yes	yes	yes	yes	yes	yes	yes	yes	yes	yes	yes	yes	yes	yes	yes	yes	yes	yes	yes	yes	yes
H25716	Patient 4	Patient 4_H25716	2011-04-03	1-18	1076	Single	no	no	no	no	yes	yes	yes	no	no	no	no	yes	yes	yes	yes	yes	yes	yes	yes	yes	yes	yes	yes	yes	yes	yes	yes	yes	yes	yes	yes	yes	yes	yes	yes	yes	yes	yes	yes	yes	yes	yes	yes
H25776	Patient 7	Patient 7_H25776	2011-02-01	1-18	1076	Single	no	no	no	no	yes	yes	yes	no	no	no	no	yes	yes	yes	no	no	no	yes	yes	yes	yes	yes	yes	yes	yes	yes	yes	yes	yes	yes	yes	yes	yes	yes	yes	yes	yes	yes	yes	yes	yes	yes	yes
H25571	Patient 17	Patient 17_H25571	2012-03-01	1-18	1076	Single	no	no	no	no	yes	yes	yes	no	no	no	no	yes	yes	yes	no	yes	no	yes	yes	yes	yes	yes	yes	yes	yes	yes	yes	yes	yes	yes	yes	yes	yes	yes	yes	yes	yes	yes	yes	yes	yes	yes	yes
H25915	Patient 12	Patient 12_H25915	2011-07-25	1-18	1076	Single	no	no	no	no	yes	yes	yes	no	no	no	no	yes	yes	yes	yes	yes	no	yes	yes	yes	yes	yes	yes	yes	yes	yes	yes	yes	yes	yes	yes	yes	yes	yes	yes	yes	yes	yes	yes	yes	yes	yes	yes
H25638	Patient 17	Patient 17_H25638	2012-01-30	1-18	1076	Single	no	no	no	no	yes	yes	yes	no	no	no	no	yes	yes	yes	yes	yes	no	yes	yes	yes	yes	yes	yes	yes	yes	yes	yes	yes	yes	yes	yes	yes	yes	yes	yes	yes	yes	yes	yes	yes	yes	yes	yes
H26490	Env. 11	Env. 11_H26490	2012-10-24	1-18	1076	Single	no	no	no	no	yes	yes	yes	no	no	no	no	yes	yes	yes	yes	yes	no	yes	yes	yes	yes	yes	yes	yes	yes	yes	yes	yes	yes	yes	yes	yes	yes	yes	yes	yes	yes	yes	yes	yes	yes	yes	yes
H25599	Patient 16	Patient 16_H25599	2012-12-04	1-18	1076	Single	no	no	no	no	yes	yes	yes	no	no	no	no	yes	yes	yes	yes	yes	no	yes	yes	yes	yes	yes	yes	yes	yes	yes	yes	yes	yes	yes	yes	yes	yes	yes	yes	yes	yes	yes	yes	yes	yes	yes	yes
H25165	Env. 5	Env. 5_H25165	2012-03-23	1-18	1076	Single	no	no	no	no	yes	yes	yes	no	no	no	no	yes	yes	yes	yes	yes	no	yes	yes	yes	yes	yes	yes	yes	yes	yes	yes	yes	yes	yes	yes	yes	yes	yes	yes	yes	yes	yes	yes	yes	yes	yes	yes
H26932	Env. 16	Env. 16_H26932	2013-01-25	1-18	1076	Single	no	no	no	no	yes	yes	yes	no	no	no	no	yes	yes	yes	yes	yes	no	yes	yes	yes	yes	yes	yes	yes	yes	yes	yes	yes	yes	yes	yes	yes	yes	yes	yes	yes	yes	yes	yes	yes	yes	yes	yes
H26071	Patient 8	Patient 8_H26071	2011-02-28	1-18	1076	Single	no	no	no	no	yes	yes	yes	no	no	no	no	yes	yes	yes	yes	yes	no	yes	yes	yes	yes	yes	yes	yes	yes	yes	yes	yes	yes	yes	yes	yes	yes	yes	yes	yes	yes	yes	yes	yes	yes	yes	yes
H25328	Patient 21	Patient 21_H25328	2012-04-13	1-18	1076	Single	no	no	no	no	yes	yes	yes	no	no	no	no	yes	yes	yes	yes	yes	yes	yes	yes	yes	yes	yes	yes	yes	yes	yes	yes	yes	yes	yes	yes	yes	yes	yes	yes	yes	yes	yes	yes	yes	yes	yes	yes
H25305	Env. 8	Env. 8_H25305	2012-04-27	1-18	1076	Single	no	no	no	no	yes	yes	yes	no	no	no	no	yes	yes	yes	yes	yes	no	yes	yes	yes	yes	yes	yes	yes	yes	yes	yes	yes	yes	yes	yes	yes	yes	yes	yes	yes	yes	yes	yes	yes	yes	yes	yes
H25163	Env. 3	Env. 3_H25163	2012-03-23	1-18	1076	Single	no	no	no	no	yes	yes	yes	no	no	no	no	yes	yes	yes	yes	yes	no	yes	yes	yes	yes	yes	yes	yes	yes	yes	yes	yes	yes	yes	yes	yes	yes	yes	yes	yes	yes	yes	yes	yes	yes	yes	yes
H25162	Env. 2	Env. 2_H25162	2012-03-23	1-18	1076	Single	no	no	no	no	yes	yes	yes	no	no	no	no	yes	yes	yes	yes	yes	no	yes	yes	yes	yes	yes	yes	yes	yes	yes	yes	yes	yes	yes	yes	yes	yes	yes	yes	yes	yes	yes	yes	yes	yes	yes	yes
H25913	Patient 11	Patient 11_H25913	2011-06-11	1-18	1076	Single	no	no	no	no	yes	yes	yes	no	no	no	no	yes	yes	yes	no	yes	no	yes	yes	yes	yes	yes	yes	yes	yes	yes	yes	yes	yes	yes	yes	yes	yes	yes	yes	yes	yes	yes	yes	yes	yes	yes	yes
H25570	Patient 18	Patient 18_H25570	2012-02-01	1-18	1076	Single	no	no	no	no	yes	yes	yes	no	no	no	no	yes	yes	yes	yes	yes	no	yes	yes	yes	yes	yes	yes	yes	yes	yes	yes	yes	yes	yes	yes	yes	yes	yes	yes	yes	yes	yes	yes	yes	yes	yes	yes
H25473	Patient 21	Patient 21_H25473	2012-03-16	1-18	1076	Single	no	no	no	no	yes	yes	yes	no	no	no	no	yes	yes	yes	yes	yes	no	yes	yes	yes	yes	yes	yes	yes	yes	yes	yes	yes	yes	yes	yes	yes	yes	yes	yes	yes	yes	yes	yes	yes	yes	yes	yes
H26935	Env. 18	Env. 18_H26935	2013-01-25	1-18	1076	Single	no	no	no	no	yes	yes	yes	no	no	no	no	yes	yes	yes	no	yes	no	yes	yes	yes	yes	yes	yes	yes	yes	yes	yes	yes	yes	yes	yes	yes	yes	yes	yes	yes	yes	yes	yes	yes	yes	yes	yes
H26934	Env. 17	Env. 17_H26934	2013-01-25	1-18	1076	Single	no	no	no	no	yes	yes	yes	no	no	no	no	yes	yes	yes	yes	yes	no	yes	yes	yes	yes	yes	yes	yes	yes	yes	yes	yes	yes	yes	yes	yes	yes	yes	yes	yes	yes	yes	yes	yes	yes	yes	yes
H26408	Patient 4	Patient 4_H26408	2011-04-13	1-18	1076	Single	no	no	no	no	yes	yes	yes	no	no	no	no	yes	yes	yes	yes	yes	no	yes	yes	yes	yes	yes	yes	yes	yes	yes	yes	yes	yes	yes	yes	yes	yes	yes	yes	yes	yes	yes	yes	yes	yes	yes	yes
H26931	Env. 15	Env. 15_H26931	2013-01-25	1-18	1076	Single	no	no	no	no	yes	yes	yes	no	no	no	no	yes	yes	yes	yes	yes	no	yes	yes	yes	yes	yes	yes	yes	yes	yes	yes	yes	yes	yes	yes	yes	yes	yes	yes	yes	yes	yes	yes	yes	yes	yes	yes
H25791	Patient 17	Patient 17_H25791	2011-12-07	1-18	1076	Single	no	no	no	no	yes	yes	yes	no	no	no	no	yes	yes	yes	no	no	no	yes	yes	yes	yes	yes	yes	yes	yes	yes	yes	yes	yes	yes	yes	yes	yes	yes	yes	yes	yes	yes	yes	yes	yes	yes	yes
H26188	Patient 22	Patient 22_H26188	2012-05-03	1-18	1076	Single	no	no	no	no	yes	yes	yes	no	no	no	no	yes	yes	yes	yes	yes	no	yes	yes	yes	yes	yes	yes	yes	yes	yes	yes	yes	yes	yes	yes	yes	yes	yes	yes	yes	yes	yes	yes	yes	yes	yes	yes
H25515	Patient 17	Patient 17_H25515	2012-02-01	1-18	1076	Single	no	no	no	no	yes	yes	yes	no	no	no	no	yes	yes	yes	no	yes	no	yes	yes	yes	yes	yes	yes	yes	yes	yes	yes	yes	yes	yes	yes	yes	yes	yes	yes	yes	yes	yes	yes	yes	yes	yes	yes
H25184	Env. 7	Env. 7_H25184	2012-03-23	1-18	1076	Single	no	no	no	no	yes	yes	yes	no	no	no	no	yes	yes	yes	yes	yes	no	yes	yes	yes	yes	yes	yes	yes	yes	yes	yes	yes	yes	yes	yes	yes	yes	yes	yes	yes	yes	yes	yes	yes	yes	yes	yes
H25883	Patient 2	Patient 2_H25883	2010-05-28	1-18	1076	Single	no	no	no	no	yes	yes	yes	no	no	no	no	yes	yes	yes	yes	yes	no	yes	yes	yes	yes	yes	yes	yes	yes	yes	yes	yes	yes	yes	yes	yes	yes	yes	yes	yes	yes	yes	yes	yes	yes	yes	yes
H26420	Patient 17	Patient 17_H26420	2012-02-15	1-18	1076	Single	no	no	no	no	yes	yes	yes	no	no	no	no	yes	yes	yes	yes	yes	no	yes	yes	yes	yes	yes	yes	yes	yes	yes	yes	yes	yes	yes	yes	yes	yes	yes	yes	yes	yes	yes	yes	yes	yes	yes	yes
H25689	Patient 11	Patient 11_H25689	2011-06-06	1-18	1076	Single	no	no	no	no	yes	yes	yes	no	no	no	no	yes	yes	yes	yes	yes	no	yes	yes	yes	yes	yes	yes	yes	yes	yes	yes	yes	yes	yes	yes	yes	yes	yes	yes	yes	yes	yes	yes	yes	yes	yes	yes
H26795	Patient 1	Patient 1_H26795	2010-04-24	1-18	1076	Burn unit	no	no	no	no	yes	yes	yes	no	no	no	no	yes	yes	yes	yes	yes	no	yes	yes	yes	yes	yes	yes	yes	yes	yes	yes	yes	yes	yes	yes	yes	yes	yes	yes	yes	yes	yes	yes	yes	yes	yes	yes
H25471	Patient 22	Patient 22_H25471	2012-04-25	1-18	1076	Single	no	no	no	no	yes	yes	yes	no	no	no	no	yes	yes	yes	yes	yes	no	yes	yes	yes	yes	yes	yes	yes	yes	yes	yes	yes	yes	yes	yes	yes	yes	yes	yes	yes	yes	yes	yes	yes	yes	yes	yes
H26413	Patient 15	Patient 15_H26413	2011-10-16	1-18	1076	Single	no	no	no	no	yes	yes	yes	no	no	no	no	yes	yes	yes	yes	yes	no	yes	yes	yes	yes	yes	yes	yes	yes	yes	yes	yes	yes	yes	yes	yes	yes	yes	yes	yes	yes	yes	yes	yes	yes	yes	yes
H27476	Patient 24	Patient 24_H27476	2012-10-25	1-18	1076	Single	no	no	no	no	no	yes	yes	no	no	no	no	no	yes	yes	no	no	no	yes	yes	yes	yes	yes	yes	yes	yes	yes	yes	yes	no	yes	no	yes	yes	yes	yes	yes	yes	yes	no	yes	yes	yes	yes
H26060	Patient 4	Patient 4_H26060	2011-01-13	1-18	1076	Single	no	no	no	no	yes	yes	yes	no	no	no	no	yes	yes	yes	no	no	no	yes	yes	yes	yes	yes	yes	yes	yes	yes	yes	yes	yes	yes	yes	yes	yes	yes	yes	yes	yes	yes	yes	yes	yes	yes	yes
H26069	Patient 8	Patient 8_H26069	2011-02-22	1-18	1076	Single	no	no	no	no	yes	yes	yes	no	no	no	no	yes	yes	yes	yes	yes	no	yes	yes	yes	yes	yes	yes	yes	yes	yes	yes	yes	yes	yes	yes	yes	yes	yes	yes	yes	yes	yes	yes	yes	yes	yes	yes
H26410	Patient 4	Patient 4_H26410	2011-04-18	1-18	1076	Single	no	no	no	no	yes	yes	yes	no	no	no	no	yes	yes	yes	yes	yes	no	yes	yes	yes	yes	yes	yes	yes	yes	yes	yes	yes	yes	yes	yes	yes	yes	yes	yes	yes	yes	yes	yes	yes	yes	yes	yes
H25624	Patient 23	Patient 23_H25624	2012-06-25	1-18	1076	Single	no	no	no	no	no	yes	yes	no	no	no	no	no	yes	yes	yes	yes	no	yes	yes	yes	yes	yes	yes	yes	yes	yes	no	yes	yes	yes	no	yes	yes	yes	yes	yes	yes	yes	yes	yes	yes	yes	yes
H26078	Patient 9	Patient 9_H26078	2011-04-04	1-18	1076	Single	no	no	no	no	yes	yes	yes	no	no	no	no	yes	yes	yes	yes	yes	no	yes	yes	yes	yes	yes	yes	yes	yes	yes	yes	yes	yes	yes	yes	yes	yes	yes	yes	yes	yes	yes	yes	yes	yes	yes	yes
H25916	Patient 13	Patient 13_H25916	2011-07-26	1-18	1076	Single	no	no	no	no	yes	yes	yes	no	no	no	no	no	yes	yes	yes	yes	no	yes	yes	yes	yes	yes	yes	yes	yes	yes	yes	yes	yes	yes	yes	yes	yes	yes	yes	yes	yes	yes	yes	yes	yes	yes	yes
H25604	Patient 19	Patient 19_H25604	2012-01-03	1-18	1076	Single	no	no	no	no	yes	yes	yes	no	no	no	no	yes	yes	yes	no	yes	no	yes	yes	yes	yes	yes	yes	yes	yes	yes	yes	yes	yes	yes	yes	yes	yes	yes	yes	yes	yes	yes	yes	yes	yes	yes	yes
H26064	Patient 6	Patient 6_H26064	2011-01-30	1-18	1076	Single	no	no	no	no	yes	yes	yes	no	no	no	no	yes	yes	yes	no	yes	no	yes	yes	yes	yes	yes	yes	yes	yes	yes	yes	yes	yes	yes	yes	yes	yes	yes	yes	yes	yes	yes	yes	yes	yes	yes	yes
H24445	Env. 1	Env. 1_H24445	2011-10-10	1-18	1076	Single	no	no	no	no	yes	yes	yes	no	no	no	no	yes	yes	yes	yes	yes	no	yes	yes	yes	yes	yes	yes	yes	yes	yes	yes	yes	yes	yes	yes	yes	yes	yes	yes	yes	yes	yes	yes	yes	yes	yes	yes
H26798	Patient 1	Patient 1_H26798	2010-03-31	1-18	1076	Burn unit	no	no	no	no	yes	yes	yes	no	no	no	no	yes	yes	yes	yes	yes	no	yes	yes	yes	yes	yes	yes	yes	yes	yes	yes	yes	yes	yes	yes	yes	yes	yes	yes	yes	yes	yes	yes	yes	yes	yes	yes
H25637	Patient 18	Patient 18_H25637	2012-02-18	1-18	1076	Single	no	no	no	no	yes	yes	yes	no	no	no	no	yes	yes	yes	yes	yes	no	yes	yes	yes	yes	yes	yes	yes	yes	yes	yes	yes	yes	yes	yes	yes	yes	yes	yes	yes	yes	yes	yes	yes	yes	yes	yes
H26230	Patient 3	Patient 3_H26230	2010-08-15	1-18	1076	Single	no	no	no	no	yes	yes	yes	no	no	no	no	yes	yes	yes	no	no	no	yes	yes	yes	yes	yes	yes	yes	yes	yes	yes	yes	yes	yes	yes	yes	yes	yes	yes	yes	yes	yes	yes	yes	yes	yes	yes
H26045	Patient 3	Patient 3_H26045	2010-08-28	1-18	1076	Single	no	no	no	no	yes	yes	yes	no	no	no	no	yes	yes	yes	yes	yes	no	yes	yes	yes	yes	yes	yes	yes	yes	yes	yes	yes	yes	yes	yes	yes	yes	yes	yes	yes	yes	yes	yes	yes	yes	yes	yes
H25692	Patient 9	Patient 9_H25692	2011-06-08	1-18	1076	Single	no	no	no	no	yes	yes	yes	no	no	no	no	yes	yes	yes	yes	yes	no	yes	yes	yes	yes	yes	yes	yes	yes	yes	yes	yes	yes	yes	yes	yes	yes	yes	yes	yes	yes	yes	yes	yes	yes	yes	yes
H25164	Env. 4	Env. 4_H25164	2012-03-23	1-18	1076	Single	no	no	no	no	yes	yes	yes	no	no	no	no	yes	yes	yes	yes	yes	no	yes	yes	yes	yes	yes	yes	yes	yes	yes	yes	yes	yes	yes	yes	yes	yes	yes	yes	yes	yes	yes	yes	yes	yes	yes	yes
H25532	Patient 10	Patient 10_H25532	2012-03-31	1-21	253	ICU2	yes	yes	yes	no	yes	yes	yes	yes	yes	yes	no	yes	yes	yes	yes	no	no	yes	yes	yes	yes	yes	yes	yes	yes	yes	yes	yes	yes	yes	yes	yes	yes	yes	yes	yes	yes	yes	yes	yes	yes	yes	yes
H25882	Patient 2	Patient 2_H25882	2010-05-03	1-21	253	Single	yes	yes	yes	no	yes	yes	yes	yes	yes	no	no	no	yes	yes	yes	no	no	yes	yes	yes	yes	yes	yes	yes	yes	yes	yes	yes	yes	yes	yes	yes	yes	yes	yes	yes	yes	yes	yes	yes	yes	yes	yes
H26926	Env. 11	Env. 11_H26926	2013-01-25	1-21	253	Single	yes	yes	yes	no	yes	yes	yes	yes	yes	yes	no	yes	yes	yes	yes	no	no	yes	yes	yes	yes	yes	yes	yes	yes	yes	yes	yes	yes	yes	yes	yes	yes	yes	yes	yes	yes	yes	yes	yes	yes	yes	yes
H25581	Patient 6	Patient 6_H25581	2011-02-28	1-21	253	Single	yes	yes	yes	no	yes	yes	yes	yes	yes	yes	no	yes	yes	yes	yes	no	no	yes	yes	yes	yes	yes	yes	yes	yes	yes	yes	yes	yes	yes	yes	yes	yes	yes	yes	yes	yes	yes	yes	yes	yes	yes	yes
H30280	Patient 16	Patient 16_H30280	2014-09-01	1-21	253	Single	yes	yes	yes	no	yes	yes	yes	yes	yes	yes	no	no	yes	yes	yes	no	no	yes	yes	yes	yes	yes	yes	yes	yes	yes	yes	yes	yes	yes	yes	yes	yes	yes	yes	yes	yes	yes	yes	yes	yes	yes	yes
H25209	Env. 5	Env. 5_H25209	2012-04-02	1-21	253	ICU2	yes	yes	yes	no	yes	yes	yes	yes	yes	no	no	yes	yes	yes	yes	no	no	yes	yes	yes	yes	yes	yes	yes	yes	yes	yes	yes	yes	yes	yes	yes	yes	yes	yes	yes	yes	yes	yes	yes	yes	yes	yes
H26049	Patient 5	Patient 5_H26049	2010-10-27	1-21	253	Single	yes	yes	yes	no	yes	yes	yes	yes	yes	no	no	no	yes	yes	yes	no	no	yes	yes	yes	yes	yes	yes	yes	yes	yes	yes	yes	yes	yes	yes	yes	yes	yes	yes	yes	yes	yes	yes	yes	yes	yes	yes
H26591	Env. 7	Env. 7_H26591	2012-11-13	1-21	253	Single	yes	yes	yes	no	yes	yes	yes	yes	yes	yes	no	yes	yes	yes	yes	no	no	yes	yes	yes	yes	yes	yes	yes	yes	yes	yes	yes	yes	yes	yes	yes	yes	yes	yes	yes	yes	yes	yes	yes	yes	yes	yes
H26662	Patient 13	Patient 13_H26662	2012-12-04	1-21	253	Single	yes	yes	yes	no	yes	yes	yes	yes	yes	no	no	yes	yes	yes	yes	no	no	yes	yes	yes	yes	yes	yes	yes	yes	yes	yes	yes	yes	yes	yes	yes	yes	yes	yes	yes	yes	yes	yes	yes	yes	yes	yes
H25710	Patient 7	Patient 7_H25710	2011-04-03	1-21	253	Single	yes	yes	yes	no	yes	yes	yes	yes	yes	yes	no	yes	yes	yes	yes	no	no	yes	yes	yes	yes	yes	yes	yes	yes	yes	yes	yes	yes	yes	yes	yes	yes	yes	yes	yes	yes	yes	yes	yes	yes	yes	yes
H28128	Env. 13	Env. 13_H28128	2013-05-29	1-21	253	Single	yes	yes	yes	no	yes	yes	yes	yes	yes	yes	no	yes	yes	yes	yes	no	no	yes	yes	yes	yes	yes	yes	yes	yes	yes	yes	yes	yes	yes	yes	yes	yes	yes	yes	yes	yes	yes	yes	yes	yes	yes	yes
H25634	Patient 11	Patient 11_H25634	2012-04-10	1-21	253	ICU2	yes	yes	yes	no	yes	yes	yes	no	yes	yes	no	yes	yes	yes	yes	no	no	yes	yes	yes	yes	yes	yes	yes	yes	yes	yes	yes	yes	yes	yes	yes	yes	yes	yes	yes	yes	yes	yes	yes	yes	yes	yes
H26031	Patient 2	Patient 2_H26031	2010-04-29	1-21	253	Single	yes	yes	yes	no	yes	yes	yes	yes	yes	yes	no	no	yes	yes	yes	no	no	yes	yes	yes	yes	yes	yes	yes	yes	yes	yes	yes	yes	yes	yes	yes	yes	yes	yes	yes	yes	yes	yes	yes	yes	yes	yes
H26782	Patient 8	Patient 8_H26782	2011-12-08	1-21	253	Single	yes	yes	yes	no	yes	yes	yes	yes	yes	yes	no	yes	yes	yes	yes	no	no	yes	yes	yes	yes	yes	yes	yes	yes	yes	yes	yes	yes	yes	yes	yes	yes	yes	yes	yes	yes	yes	yes	yes	yes	yes	yes
H13893	Env. 1	Env. 1_H13893	2004-05-18	1-21	253	Single	no	no	no	no	yes	yes	yes	yes	yes	yes	yes	yes	yes	yes	yes	no	no	yes	yes	yes	yes	yes	yes	yes	yes	yes	yes	yes	yes	yes	yes	yes	yes	yes	yes	yes	yes	yes	yes	yes	yes	yes	yes
H25308	Env. 6	Env. 6_H25308	2012-04-27	1-21	253	Single	yes	yes	yes	no	yes	yes	yes	yes	yes	no	no	yes	yes	yes	yes	no	no	yes	yes	yes	yes	yes	yes	yes	yes	yes	yes	yes	yes	yes	yes	yes	yes	yes	yes	yes	yes	yes	yes	yes	yes	yes	yes
H25167	Env. 3	Env. 3_H25167	2012-03-23	1-21	253	Single	yes	yes	yes	no	yes	yes	yes	yes	yes	yes	no	yes	yes	yes	no	no	no	yes	yes	yes	yes	yes	yes	yes	yes	yes	yes	yes	yes	yes	yes	yes	yes	yes	yes	yes	yes	yes	yes	yes	yes	yes	yes
H30236	Patient 15	Patient 15_H30236	2014-08-08	1-21	253	Single	yes	yes	yes	no	yes	yes	yes	yes	yes	yes	no	no	yes	yes	yes	no	no	yes	yes	yes	yes	yes	yes	yes	yes	yes	yes	yes	yes	yes	yes	yes	yes	yes	yes	yes	yes	yes	yes	yes	yes	yes	yes
H26973	Patient 14	Patient 14_H26973	2013-02-02	1-21	253	Single	yes	yes	yes	no	yes	yes	yes	yes	yes	yes	no	yes	yes	yes	yes	no	no	yes	yes	yes	yes	yes	yes	yes	yes	yes	yes	yes	yes	yes	yes	yes	yes	yes	yes	yes	yes	yes	yes	yes	yes	yes	yes
H25175	Env. 4	Env. 4_H25175	2012-03-23	1-21	253	Single	yes	yes	yes	no	yes	yes	yes	yes	yes	no	no	yes	yes	yes	no	no	no	yes	yes	yes	yes	yes	yes	yes	yes	yes	yes	yes	yes	yes	yes	yes	yes	yes	yes	yes	yes	yes	yes	yes	yes	yes	yes
H14442	Env. 2	Env. 2_H14442	2004-12-23	1-21	253	Single	no	no	no	no	yes	yes	yes	yes	yes	yes	yes	yes	yes	yes	yes	no	no	yes	yes	yes	yes	yes	yes	yes	yes	yes	yes	yes	yes	yes	yes	yes	yes	yes	yes	yes	yes	yes	yes	yes	yes	yes	yes
H27714	Env. 12	Env. 12_H27714	2013-03-07	1-21	253	Single	no	no	no	no	yes	yes	yes	yes	yes	yes	yes	yes	yes	yes	yes	no	no	yes	yes	yes	yes	yes	yes	yes	yes	yes	yes	yes	yes	yes	yes	yes	yes	yes	yes	yes	yes	yes	yes	yes	yes	yes	yes
H25575	Patient 9	Patient 9_H25575	2012-03-13	1-21	253	Single	yes	yes	yes	no	yes	yes	yes	yes	yes	yes	no	yes	yes	yes	yes	no	no	yes	yes	yes	yes	yes	yes	yes	yes	yes	yes	yes	yes	yes	yes	yes	yes	yes	yes	yes	yes	yes	yes	yes	yes	yes	yes
H26930	Env. 10	Env. 10_H26930	2013-01-25	1-21	253	Single	yes	yes	yes	no	yes	yes	yes	yes	yes	no	no	yes	yes	yes	yes	no	no	yes	yes	yes	yes	yes	yes	yes	yes	yes	yes	yes	yes	yes	yes	yes	yes	yes	yes	yes	yes	yes	yes	yes	yes	yes	yes
H26933	Env. 9	Env. 9_H26933	2013-01-25	1-21	253	Single	yes	yes	yes	no	yes	yes	yes	yes	yes	yes	no	no	yes	yes	yes	no	no	yes	yes	yes	yes	yes	yes	yes	yes	yes	yes	yes	yes	yes	yes	yes	yes	yes	yes	yes	yes	yes	yes	yes	yes	yes	yes
H26615	Patient 12	Patient 12_H26615	2012-11-07	1-21	253	Single	yes	yes	yes	no	yes	yes	yes	yes	yes	yes	no	yes	yes	yes	yes	no	no	yes	yes	yes	yes	yes	yes	yes	yes	yes	yes	yes	yes	yes	yes	yes	yes	yes	yes	yes	yes	yes	yes	yes	yes	yes	yes
H25897	Patient 4	Patient 4_H25897	2010-09-02	1-21	253	Single	yes	yes	yes	no	yes	yes	yes	yes	yes	yes	no	yes	yes	yes	yes	no	no	yes	yes	yes	yes	yes	yes	yes	yes	yes	yes	yes	yes	yes	yes	yes	yes	yes	yes	yes	yes	yes	yes	yes	yes	yes	yes
H26677	Env. 8	Env. 8_H26677	2012-12-07	1-21	253	Single	yes	yes	yes	no	yes	yes	yes	yes	yes	yes	no	yes	yes	yes	yes	no	no	yes	yes	yes	yes	yes	yes	yes	yes	yes	yes	yes	yes	yes	yes	yes	yes	yes	yes	yes	yes	yes	yes	yes	yes	yes	yes
H26083	Patient 3	Patient 3_H26083	2010-05-18	1-21	253	Single	yes	yes	yes	no	yes	yes	yes	yes	yes	no	no	yes	yes	yes	yes	no	no	yes	yes	yes	yes	yes	yes	yes	yes	yes	yes	yes	yes	yes	yes	yes	yes	yes	yes	yes	yes	yes	yes	yes	yes	yes	yes
H26023	Patient 1	Patient 1_H26023	2010-01-08	1-21	253	Single	yes	yes	yes	no	yes	yes	yes	no	yes	yes	no	no	yes	yes	yes	no	no	yes	yes	yes	yes	yes	yes	yes	yes	yes	yes	yes	yes	yes	yes	yes	yes	yes	yes	yes	yes	yes	yes	yes	yes	yes	yes
H25601	Patient 6	Patient 6_H25601	2011-12-31	1-21	253	Single	yes	yes	yes	no	yes	yes	yes	yes	yes	no	no	yes	yes	yes	yes	no	no	yes	yes	yes	yes	yes	yes	yes	yes	yes	yes	yes	yes	yes	yes	yes	yes	yes	yes	yes	yes	yes	yes	yes	yes	yes	yes
H25200	Env 3	Env. 3_H25200	2012-04-02	6-7	17	Single	no	no	no	yes	yes	yes	yes	no	no	no	no	yes	yes	yes	yes	no	no	yes	yes	yes	yes	yes	yes	yes	yes	yes	yes	yes	yes	yes	yes	yes	yes	yes	yes	yes	yes	yes	yes	yes	yes	yes	yes
H26571	Env 12	Env. 12_H26571	2012-11-08	6-7	17	Single	no	no	no	yes	yes	yes	yes	no	no	no	no	yes	yes	yes	yes	no	no	yes	yes	yes	yes	yes	yes	yes	yes	yes	yes	yes	yes	yes	yes	yes	yes	yes	yes	yes	yes	yes	yes	yes	yes	yes	yes
H25284	Env 5	Env. 5_H25284	2012-04-27	6-7	17	Single	no	no	no	yes	yes	yes	yes	no	no	yes	no	yes	yes	yes	yes	no	no	yes	yes	yes	yes	yes	yes	yes	yes	yes	yes	yes	yes	yes	yes	yes	yes	yes	yes	yes	yes	yes	yes	yes	yes	yes	yes
H30438	Patient 21	Patient 21_H30438	2014-10-15	6-7	17	Single	no	no	no	no	no	no	yes	no	no	no	no	yes	yes	yes	yes	no	no	yes	yes	yes	yes	yes	yes	yes	yes	yes	yes	yes	yes	yes	yes	yes	yes	yes	yes	yes	yes	yes	yes	yes	yes	yes	yes
H25723	Patient 7	Patient 7_H25723	2011-05-04	6-7	17	Single	no	no	no	yes	yes	yes	yes	no	no	no	no	yes	yes	yes	no	no	no	yes	yes	yes	yes	yes	yes	yes	yes	yes	yes	yes	yes	yes	yes	yes	yes	yes	yes	yes	yes	yes	yes	yes	yes	yes	yes
H26042	Patient 4	Patient 4_H26042	2010-08-03	6-7	17	Burn unit	no	no	no	yes	yes	yes	yes	no	no	yes	no	yes	yes	yes	yes	no	no	yes	yes	yes	yes	yes	yes	yes	yes	yes	yes	yes	yes	yes	yes	yes	yes	yes	yes	yes	yes	yes	yes	yes	yes	yes	yes
H26722	Env 13	Env. 13_H26722	2012-12-11	6-7	17	Single	no	no	no	yes	yes	yes	yes	no	no	no	no	yes	yes	yes	no	no	no	yes	yes	yes	yes	yes	yes	yes	yes	yes	yes	yes	yes	yes	yes	yes	yes	yes	yes	yes	yes	yes	yes	yes	yes	yes	yes
H26532	Env 11	Env. 11_H26532	2012-11-07	6-7	17	Single	no	no	no	yes	yes	yes	yes	no	no	yes	no	yes	yes	yes	no	no	no	yes	yes	yes	yes	yes	yes	yes	yes	yes	yes	yes	yes	yes	yes	yes	yes	yes	yes	yes	yes	yes	yes	yes	yes	yes	yes
H25787	Env 8	Env. 8_H25787	2012-07-17	6-7	17	Single	no	no	no	yes	yes	yes	yes	no	no	yes	no	yes	yes	yes	yes	no	no	yes	yes	yes	yes	yes	yes	yes	yes	yes	yes	yes	yes	yes	yes	yes	yes	yes	yes	yes	yes	yes	yes	yes	yes	yes	yes
H27995	Patient 15	Patient 15_H27995	2013-04-09	6-7	17	Single	no	no	no	yes	yes	yes	yes	no	no	no	no	yes	yes	yes	yes	no	no	yes	yes	yes	yes	yes	yes	yes	yes	yes	yes	yes	yes	yes	yes	yes	yes	yes	yes	yes	yes	yes	yes	yes	yes	yes	yes
H25785	Env 7	Env. 7_H25785	2012-07-17	6-7	17	Single	no	no	no	yes	yes	yes	yes	no	no	no	no	yes	yes	yes	yes	no	no	yes	yes	yes	yes	yes	yes	yes	yes	yes	yes	yes	yes	yes	yes	yes	yes	yes	yes	yes	yes	yes	yes	yes	yes	yes	yes
H26375	Patient 13	Patient 13_H26375	2012-09-26	6-7	17	Single	no	no	no	yes	yes	yes	yes	no	no	yes	no	yes	yes	yes	no	no	no	yes	yes	yes	yes	yes	yes	yes	yes	yes	yes	yes	yes	yes	yes	yes	yes	yes	yes	yes	yes	yes	yes	yes	yes	yes	yes
H27846	Patient 15	Patient 15_H27846	2013-03-21	6-7	17	Single	no	no	no	yes	yes	yes	yes	no	no	no	no	yes	yes	yes	yes	no	no	yes	yes	yes	yes	yes	yes	yes	yes	yes	yes	yes	yes	yes	yes	yes	yes	yes	yes	yes	yes	yes	yes	yes	yes	yes	yes
H25889	Patient 3	Patient 3_H25889	2010-07-25	6-7	17	Burn unit	no	no	no	yes	yes	yes	yes	no	no	no	no	yes	yes	yes	yes	no	no	yes	yes	yes	yes	yes	yes	yes	yes	yes	yes	yes	yes	yes	yes	yes	yes	yes	yes	yes	yes	yes	yes	yes	yes	yes	yes
H25961	Env 9	Env. 9_H25961	2012-07-30	6-7	17	Single	no	no	no	yes	yes	yes	yes	no	no	no	no	yes	yes	yes	yes	no	no	yes	yes	yes	yes	yes	yes	yes	yes	yes	yes	yes	yes	yes	yes	yes	yes	yes	yes	yes	yes	yes	yes	yes	yes	yes	yes
H28167	Patient 17	Patient 17_H28167	2013-05-30	6-7	17	Single	no	no	no	yes	yes	yes	yes	no	no	yes	no	yes	yes	yes	yes	no	no	yes	yes	yes	yes	yes	yes	yes	yes	yes	yes	yes	yes	yes	yes	yes	yes	yes	yes	yes	yes	yes	yes	yes	yes	yes	yes
H25984	Patient 10	Patient 10_H25984	2011-08-26	6-7	17	Single	no	no	no	yes	yes	yes	yes	no	no	no	no	yes	yes	yes	yes	no	no	yes	yes	yes	yes	yes	yes	yes	yes	yes	yes	yes	yes	yes	yes	yes	yes	yes	yes	yes	yes	yes	yes	yes	yes	yes	yes
H26760	Patient 14	Patient 14_H26760	2012-12-12	6-7	17	Single	no	no	no	yes	yes	yes	yes	no	no	no	no	yes	yes	yes	no	no	no	yes	yes	yes	yes	yes	yes	yes	yes	yes	yes	yes	yes	yes	yes	yes	yes	yes	yes	yes	yes	yes	yes	yes	yes	yes	yes
H25900	Patient 6	Patient 6_H25900	2010-09-16	6-7	17	Single	no	no	no	yes	yes	yes	yes	no	no	no	no	yes	yes	yes	yes	no	no	yes	yes	yes	yes	yes	yes	yes	yes	yes	yes	yes	yes	yes	yes	yes	yes	yes	yes	yes	yes	yes	yes	yes	yes	yes	yes
H26027	Patient 1	Patient 1_H26027	2010-04-06	6-7	17	Burn unit	no	no	no	yes	yes	yes	yes	no	no	no	no	yes	yes	yes	yes	no	no	yes	yes	yes	yes	yes	yes	yes	yes	yes	yes	yes	yes	yes	yes	yes	yes	yes	yes	yes	yes	yes	yes	yes	yes	yes	yes
H26036	Patient 2	Patient 2_H26036	2010-06-20	6-7	17	Burn unit	no	no	no	yes	yes	yes	yes	no	no	no	no	yes	yes	yes	yes	no	no	yes	yes	yes	yes	yes	yes	yes	yes	yes	yes	yes	yes	yes	yes	yes	yes	yes	yes	yes	yes	yes	yes	yes	yes	yes	yes
H25718	Patient 7	Patient 7_H25718	2011-04-19	6-7	17	Single	no	no	no	yes	yes	yes	yes	no	no	yes	no	yes	yes	yes	no	no	no	yes	yes	yes	yes	yes	yes	yes	yes	yes	yes	yes	yes	yes	yes	yes	yes	yes	yes	yes	yes	yes	yes	yes	yes	yes	yes
H25908	Patient 7	Patient 7_H25908	2011-05-21	6-7	17	Single	no	no	no	yes	yes	yes	yes	no	no	yes	no	yes	yes	yes	yes	no	no	yes	yes	yes	yes	yes	yes	yes	yes	yes	yes	yes	yes	yes	yes	yes	yes	yes	yes	yes	yes	yes	yes	yes	yes	yes	yes
H29762	Env 15	Env. 15_H29762	2014-03-04	6-7	17	Single	no	no	no	yes	yes	yes	yes	no	no	no	no	yes	yes	yes	yes	no	no	yes	yes	yes	yes	yes	yes	yes	yes	yes	yes	yes	yes	yes	yes	yes	yes	yes	yes	yes	yes	yes	yes	yes	yes	yes	yes
H25298	Env 6	Env. 6_H25298	2012-04-27	6-7	17	Single	no	no	no	yes	yes	yes	yes	no	no	no	no	yes	yes	yes	yes	no	no	yes	yes	yes	yes	yes	yes	yes	yes	yes	yes	yes	yes	yes	yes	yes	yes	yes	yes	yes	yes	yes	yes	yes	yes	yes	yes
H30429	Patient 20	Patient 20_H30429	2014-10-13	6-7	17	Single	no	no	no	yes	yes	yes	yes	no	no	no	no	yes	yes	yes	no	no	no	yes	yes	yes	yes	yes	yes	yes	yes	yes	yes	yes	yes	yes	yes	yes	yes	yes	yes	yes	yes	yes	yes	yes	yes	yes	yes
H24447	Env 2	Env. 2_H24447	2011-10-10	6-7	17	Single	no	no	no	yes	yes	yes	yes	no	no	yes	no	yes	yes	yes	no	no	no	yes	yes	yes	yes	yes	yes	yes	yes	yes	yes	yes	yes	yes	yes	yes	yes	yes	yes	yes	yes	yes	yes	yes	yes	yes	yes
H26524	Env 10	Env. 10_H26524	2012-11-07	6-7	17	Single	no	no	no	yes	yes	yes	yes	no	no	no	no	yes	yes	yes	yes	no	no	yes	yes	yes	yes	yes	yes	yes	yes	yes	yes	yes	yes	yes	yes	yes	yes	yes	yes	yes	yes	yes	yes	yes	yes	yes	yes
H26426	Patient 13	Patient 13_H26426	2012-10-07	6-7	17	Single	no	no	no	yes	yes	yes	yes	no	no	no	no	yes	yes	yes	yes	no	no	yes	yes	yes	yes	yes	yes	yes	yes	yes	yes	yes	yes	yes	yes	yes	yes	yes	yes	yes	yes	yes	yes	yes	yes	yes	yes
H24436	Env 1	Env. 1_H24436	2011-10-10	6-7	845	Single	no	no	no	yes	yes	yes	yes	no	no	no	no	yes	yes	yes	yes	no	no	yes	yes	yes	yes	yes	yes	yes	yes	yes	yes	yes	yes	yes	yes	yes	yes	yes	yes	yes	yes	yes	yes	yes	yes	yes	yes
H27791	Env 14	Env. 14_H27791	2013-03-20	6-7	17	Single	no	no	no	yes	yes	yes	yes	no	no	yes	no	yes	yes	yes	yes	no	no	yes	yes	yes	yes	yes	yes	yes	yes	yes	yes	yes	yes	yes	yes	yes	yes	yes	yes	yes	yes	yes	yes	yes	yes	yes	yes
H26203	Patient 2	Patient 2_H26203	2010-06-18	6-7	17	Burn unit	no	no	no	yes	yes	yes	yes	no	no	yes	no	yes	yes	yes	yes	no	no	yes	yes	yes	yes	yes	yes	yes	yes	yes	yes	yes	yes	yes	yes	yes	yes	yes	yes	yes	yes	yes	yes	yes	yes	yes	yes
H26202	Patient 2	Patient 2_H26202	2010-06-18	6-7	17	Burn unit	no	no	no	yes	yes	yes	yes	no	no	no	no	yes	yes	yes	no	no	no	yes	yes	yes	yes	yes	yes	yes	yes	yes	yes	yes	yes	yes	yes	yes	yes	yes	yes	yes	yes	yes	yes	yes	yes	yes	yes
H29477	Patient 18	Patient 18_H29477	2014-01-10	6-7	17	Single	no	no	no	no	no	no	yes	no	no	yes	no	yes	yes	yes	yes	no	no	yes	yes	yes	yes	yes	yes	yes	yes	yes	yes	yes	yes	yes	yes	yes	yes	yes	yes	yes	yes	yes	yes	yes	yes	yes	yes
H25508	Patient 11	Patient 11_H25508	2011-12-06	6-7	17	Single	no	no	no	yes	yes	yes	yes	no	no	no	no	yes	yes	yes	yes	no	no	yes	yes	yes	yes	yes	yes	yes	yes	yes	yes	yes	yes	yes	yes	yes	yes	yes	yes	yes	yes	yes	yes	yes	yes	yes	yes
H25979	Patient 5	Patient 5_H25979	2010-09-10	6-7	17	Burn unit	no	no	no	yes	yes	yes	yes	no	no	no	no	yes	yes	yes	yes	no	no	yes	yes	yes	yes	yes	yes	yes	yes	yes	yes	yes	yes	yes	yes	yes	yes	yes	yes	yes	yes	yes	yes	yes	yes	yes	yes
H26086	Patient 2	Patient 2_H26086	2010-07-10	6-7	17	Burn unit	no	no	no	yes	yes	yes	yes	no	no	no	no	yes	yes	yes	no	no	no	yes	yes	yes	yes	yes	yes	yes	yes	yes	yes	yes	yes	yes	yes	yes	yes	yes	yes	yes	yes	yes	yes	yes	yes	yes	yes
H25632	Patient 12	Patient 12_H25632	2012-05-04	6-7	17	Single	no	no	no	yes	yes	yes	yes	no	no	no	no	yes	yes	yes	yes	no	no	yes	yes	yes	yes	yes	yes	yes	yes	yes	yes	yes	yes	yes	yes	yes	yes	yes	yes	yes	yes	yes	yes	yes	yes	yes	yes
H28085	Patient 16	Patient 16_H28085	2013-05-17	6-7	17	Single	no	no	no	yes	yes	yes	yes	no	no	no	no	yes	yes	yes	no	no	no	yes	yes	yes	yes	yes	yes	yes	yes	yes	yes	yes	yes	yes	yes	yes	yes	yes	yes	yes	yes	yes	yes	yes	yes	yes	yes
H26247	Patient 11	Patient 11_H26247	2011-11-18	6-7	17	Single	no	no	no	yes	yes	yes	yes	no	no	no	no	yes	yes	yes	yes	no	no	yes	yes	yes	yes	yes	yes	yes	yes	yes	yes	yes	yes	yes	yes	yes	yes	yes	yes	yes	yes	yes	yes	yes	yes	yes	yes
H26260	Patient 9	Patient 9_H26260	2011-07-30	6-7	17	Single	no	no	no	yes	yes	yes	yes	no	no	yes	no	yes	yes	yes	no	no	no	yes	yes	yes	yes	yes	yes	yes	yes	yes	yes	yes	yes	yes	yes	yes	yes	yes	yes	yes	yes	yes	yes	yes	yes	yes	yes
H26084	Patient 2	Patient 2_H26084	2010-06-02	6-7	17	Burn unit	no	no	no	yes	yes	yes	yes	no	no	no	no	yes	yes	yes	no	no	no	yes	yes	yes	yes	yes	yes	yes	yes	yes	yes	yes	yes	yes	yes	yes	yes	yes	yes	yes	yes	yes	yes	yes	yes	yes	yes
H25952	Patient 8	Patient 8_H25952	2011-07-21	6-7	17	Single	no	no	no	yes	yes	yes	yes	no	no	no	no	yes	yes	yes	yes	no	no	yes	yes	yes	yes	yes	yes	yes	yes	yes	yes	yes	yes	yes	yes	yes	yes	yes	yes	yes	yes	yes	yes	yes	yes	yes	yes
H26416	Patient 11	Patient 11_H26416	2011-11-07	6-7	17	Single	no	no	no	yes	yes	yes	yes	no	no	no	no	yes	yes	yes	no	no	no	yes	yes	yes	yes	yes	yes	yes	yes	yes	yes	yes	yes	yes	yes	yes	yes	yes	yes	yes	yes	yes	yes	yes	yes	yes	yes
H29924	Patient 19	Patient 19_H29924	2014-04-26	6-7	17	Single	no	no	no	yes	yes	yes	yes	no	no	yes	no	yes	yes	yes	yes	no	no	yes	yes	yes	yes	yes	yes	yes	yes	yes	yes	yes	yes	yes	yes	yes	yes	yes	yes	yes	yes	yes	yes	yes	yes	yes	yes
H25213	Env 4	Env. 4_H25213	2012-04-03	6-7	17	Single	no	no	no	yes	yes	yes	yes	no	no	yes	no	yes	yes	yes	yes	no	no	yes	yes	yes	yes	yes	yes	yes	yes	yes	yes	yes	yes	yes	yes	yes	yes	yes	yes	yes	yes	yes	yes	yes	yes	yes	yes
H26044	Patient 5	Patient 5_H26044	2010-08-15	6-7	17	Burn unit	no	no	no	yes	yes	yes	yes	no	no	no	no	yes	yes	yes	yes	no	no	yes	yes	yes	yes	yes	yes	yes	yes	yes	yes	yes	yes	yes	yes	yes	yes	yes	yes	yes	yes	yes	yes	yes	yes	yes	yes
H26046	Patient 4	Patient 4_H26046	2010-08-30	6-7	17	Burn unit	no	no	no	yes	yes	yes	yes	no	no	no	no	yes	yes	yes	yes	no	no	yes	yes	yes	yes	yes	yes	yes	yes	yes	yes	yes	yes	yes	yes	yes	yes	yes	yes	yes	yes	yes	yes	yes	yes	yes	yes
[truncated: 366 more columns]
